# Supplementary material for: Bilateral π-extension of an open-[60]fullerene in a helical manner
Source: Royal Society of Chemistry journal article supplement (doi:10.1039/d3cc00784g), 2023-01-01
Supplement: d3cc00784g1.pdf [file d3cc00784g1.pdf]

**Supporting Information**

**Bilateral  $\pi$ -Extension of an Open-[60]Fullerene  
in a Helical Manner**

Yoshifumi Hashikawa, Shumpei Sadai, and Yasujiro Murata\*

*Institute for Chemical Research, Kyoto University, Uji, Kyoto 611-0011, Japan*

*Fax: (+81)774-38-3178*

*E-mail: yasujiro@scl.kyoto-u.ac.jp*

## Contents

|                                                                                                                                             |     |
|---------------------------------------------------------------------------------------------------------------------------------------------|-----|
| 1. General                                                                                                                                  | S3  |
| 2. Computational Methods                                                                                                                    | S3  |
| 3. Synthesis                                                                                                                                | S4  |
| 3.1. Synthesis of <b>3</b>                                                                                                                  | S4  |
| 3.2. Synthesis of <b>4</b>                                                                                                                  | S8  |
| 3.3. Synthesis of <b>5</b>                                                                                                                  | S13 |
| 4. UV-Vis-NIR Absorption                                                                                                                    | S17 |
| 5. Single Crystal X-Ray-Structure of<br>$[\{(H_2O)_{0.448(16)}(N_2)_{0.340(11)}\} @ \mathbf{3}] \cdot (acetone)_{2.22} \cdot (CS_2)_{0.22}$ | S18 |
| 6. DFT Calculations                                                                                                                         | S20 |
| 6.1. Optimized Structures of <b>1</b> and <b>2</b>                                                                                          | S20 |
| 6.2. Molecular Orbitals of <b>1</b> and <b>3</b>                                                                                            | S24 |
| 6.3. Orbital Energy Levels of <b>1–6</b>                                                                                                    | S29 |
| 7. References                                                                                                                               | S36 |

## 1. General

The  $^1\text{H}$ ,  $^{13}\text{C}$ , and  $^{19}\text{F}$  NMR measurements were carried out at room temperature unless otherwise noted with a JEOL JNM ECA500 and Bruker Avance III 800US Plus instruments. The NMR chemical shifts were reported in ppm with reference to residual protons and carbons of acetone- $d_6$  ( $\delta$  2.05 ppm in  $^1\text{H}$  NMR,  $\delta$  29.92 ppm in  $^{13}\text{C}$  NMR). The  $^{19}\text{F}$  NMR chemical shift was calibrated with a signal of trifluoroacetic acid in acetone- $d_6/\text{CS}_2$  (1:5) ( $\delta$  -76.55 ppm). APCI (atmospheric pressure chemical ionization) mass spectra were measured on a Bruker micrOTOF-Q II. UV-vis-NIR absorption spectra were measured with a Shimadzu UV-3150 spectrometer. Thin layer chromatography (TLC) was performed on glass plates coated with 0.25 mm thick silica gel 60F-254 (Merck). Column chromatography was performed using PSQ 60B (Fuji Silysia).

Fullerene  $\text{C}_{60}$  was purchased from SES Research Co. *o*-Dichlorobenzene (ODCB) was purchased from Sigma-Aldrich Co. LLC. 4,5-Dimethyl-1,2-phenylenediamine and *p*-tolyl isocyanate were purchased from Tokyo Chemical Industry Co. Ltd. Benzene and toluene were purchased from Nakalai Tesque, Inc. Pyridine (dehydrated), carbon disulfide, acetone, ethyl acetate, and trifluoroacetic acid were purchased from FUJIFILM Wako Pure Chemical Corporation.

All reactions were carried out under Ar atmosphere except for cases showing specific notation. Unless otherwise noted, materials purchased from commercial suppliers were used without further purification. Compounds **1**, **2**, and **6** were synthesized according to literature procedures.<sup>1</sup>

## 2. Computational Methods

All calculations were conducted using the Gaussian 09 program. All structures at the stationary states were optimized at the B3LYP/6-31G(d) or B3LYP-D3/6-31G(d) level of theory without any symmetry assumptions and confirmed by the frequency analyses at the same level of theory. Using the geometries optimized at the B3LYP-D3/6-31G(d) level of theory, natural population analysis was performed at the same level of theory. Using the geometries optimized at the B3LYP/6-31G(d) level of theory, TD-DFT calculations were conducted at the CAM-B3LYP/6-31G(d) level of theory.

### 3. Synthesis

#### 3.1. Synthesis of 3

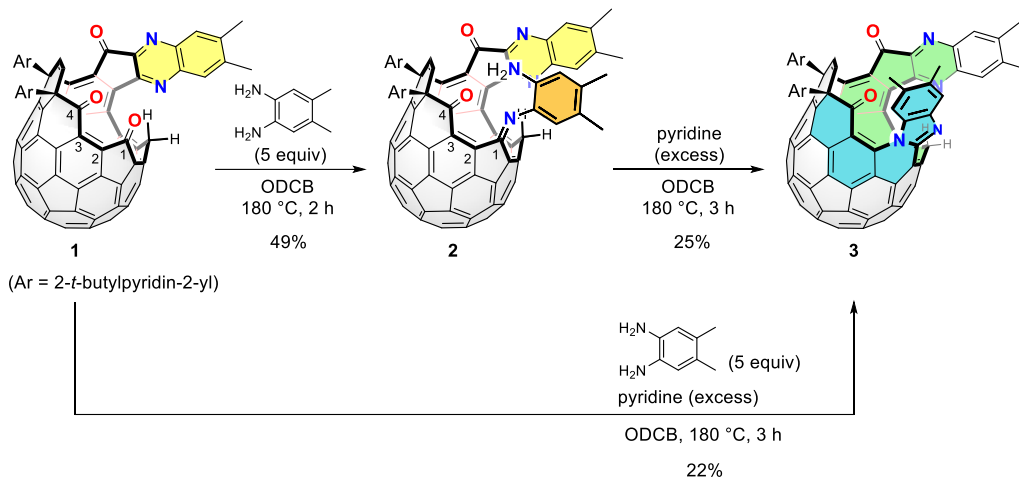

[Stepwise synthesis]

Powdery **1** (5.05 mg, 4.14  $\mu\text{mol}$ ) and 4,5-dimethyl-1,2-phenylenediamine (2.81 mg, 20.6  $\mu\text{mol}$ , 4.99 equiv) were placed into a Schlenk tube and degassed through three vacuum-Ar cycles. ODCB (0.250 mL) was added and the resulting solution was heated at 180 °C for 2 h (aluminum block heater). The crude mixture was purified by column chromatography using silica gel (toluene/ethyl acetate (50:1) to (30:1)) to give unreacted **1** (2.54 mg, 2.08  $\mu\text{mol}$ , 50%) followed by **2** (2.70 mg, 2.02  $\mu\text{mol}$ , 49%) as brown powders. Subsequently, **2** (8.04 mg, 6.00  $\mu\text{mol}$ ) was placed into a Schlenk tube and degassed through three vacuum-Ar cycles. ODCB (0.400 mL) and pyridine (24.0  $\mu\text{L}$ ,  $\rho = 0.982$  g/mL, 298  $\mu\text{mol}$ , 50 equiv) were added and the resulting solution was heated at 180 °C for 3 h (aluminum block heater). The junk material produced during the reaction was firstly removed by column chromatography using silica gel (toluene/ethyl acetate (100:1)) to give a mixture containing **3** (4.85 mg). The mixture was then purified by column chromatography using silica gel ( $\text{CS}_2$ /acetone (150:1)) to give **3** (1.98 mg, 1.48  $\mu\text{mol}$ , 25%) as a brown powder.

[One-pot synthesis]

Powdery **1** (25.0 mg, 20.5  $\mu\text{mol}$ ) and 4,5-dimethyl-1,2-phenylenediamine (13.9 mg, 102  $\mu\text{mol}$ , 4.98 equiv) were placed into a Schlenk tube and degassed through three vacuum-Ar cycles. ODCB (1.25 mL) and pyridine (68.4  $\mu\text{L}$ ,  $\rho = 0.982$  g/mL, 849  $\mu\text{mol}$ , 41 equiv) were added and the resulting solution was heated at 180 °C for 3 h (aluminum block heater). The junk material produced during the reaction was firstly removed by column chromatography using silica gel (toluene/ethyl acetate (100:1)) to give a mixture

containing **3** (10.8 mg). The mixture was then purified by column chromatography using silica gel (CS<sub>2</sub>/acetone (200:1)) to give **3** (5.90 mg, 4.41 μmol, 22%) as a brown powder.

**2**: <sup>1</sup>H NMR (500 MHz, acetone-*d*<sub>6</sub>/CS<sub>2</sub> (1:5)) δ 8.11 (s, 1H), 8.04 (s, 1H), 7.67 (t, 1H, *J* = 7.5 Hz), 7.65 (d, 1H, *J* = 10.3 Hz), 7.56 (t, 1H, *J* = 7.5 Hz), 7.47 (d, 1H, *J* = 7.5 Hz), 7.28 (d, 1H, *J* = 7.5 Hz), 7.25 (d, 1H, *J* = 7.5 Hz), 7.14 (d, 1H, *J* = 7.5 Hz), 6.55 (d, 1H, *J* = 10.3 Hz), 4.69 (d, 1H, *J* = 20.9 Hz), 3.26 (d, 1H, *J* = 20.9 Hz), 2.68 (s, 3H), 2.67 (s, 3H), 1.21 (s, 9H), 1.11 (s, 9H), -10.73 (br s, trace); HRMS (APCI) *m/z*: [M]<sup>-</sup> Calcd for C<sub>90</sub>H<sub>36</sub>N<sub>4</sub>O<sub>3</sub> (**2**) 1220.2793; Found 1220.2768. (These data matched well with the reported ones.<sup>1</sup>)

**3**: <sup>1</sup>H NMR (500 MHz, acetone-*d*<sub>6</sub>/CS<sub>2</sub> (1:5), room temperature) δ 8.12 (s, 1H), 8.00 (s, 1H), 7.62 (t, 2H, *J* = 7.5 Hz), 7.35 (d, 1H, *J* = 7.5 Hz), 7.31 (br d, 1H, *J* = 9.2 Hz), 7.25 (d, 1H, *J* = 7.5 Hz), 7.21 (d, 1H, *J* = 7.5 Hz), 7.16 (s, 1H), 7.15 (d, 1H, *J* = 7.5 Hz), 7.14 (s, 1H), 6.09 (br d, 1H, *J* = 9.2 Hz), 5.13 (br s, 1H), 2.74 (s, 3H), 2.72 (s, 3H), 2.38 (s, 3H), 2.37 (s, 3H), 1.35 (s, 9H), 1.21 (s, 9H) (One of the proton signals, which was assigned as methylene protons, was not observed due to severe broadening at room temperature while it appeared at δ 3.12 ppm (d, 1H, *J* = 20.2 Hz) at -30 °C and the coupling partner was observed as a doublet signal at δ 5.15 ppm (d, 1H, *J* = 20.2 Hz).); <sup>13</sup>C NMR (201 MHz, acetone-*d*<sub>6</sub>/CS<sub>2</sub> (1:5), -30 °C) δ 192.00, 187.42, 168.12, 167.60, 163.80, 163.71, 154.23, 153.91, 153.32, 152.56, 151.97, 151.31, 151.25, 150.78, 150.53, 149.95, 149.66, 149.56, 149.45, 149.28, 148.53, 148.33, 147.83, 147.77, 147.42, 147.25, 147.21, 146.51, 146.39, 145.93, 145.70, 144.77, 144.45, 144.26, 144.06, 143.60, 143.27, 143.15, 143.03, 142.34, 142.23, 142.13, 141.87, 141.40, 140.88, 139.97, 139.06, 137.78, 137.67, 137.51, 137.43, 136.84, 136.37, 135.62, 135.42, 135.23, 135.17, 135.06, 134.40, 134.03, 133.25, 132.67, 132.47, 132.24, 131.29, 130.55, 130.38, 130.29, 130.27, 129.92, 129.42, 127.24, 124.92, 124.81, 124.61, 121.67, 121.39, 120.92, 120.57, 117.88, 117.71, 114.99, 58.69, 52.83, 44.82, 37.82, 37.72, 30.63, 30.32, 21.54, 21.53, 21.06, 21.02 (The sum of carbon signals must be 94 in theory. Observed 93. One sp<sup>2</sup> carbon signal is overlapped.); HRMS (APCI) *m/z*: [M]<sup>-</sup> Calcd for C<sub>98</sub>H<sub>44</sub>N<sub>6</sub>O<sub>2</sub> (**3**) 1336.3531; Found 1336.3477.

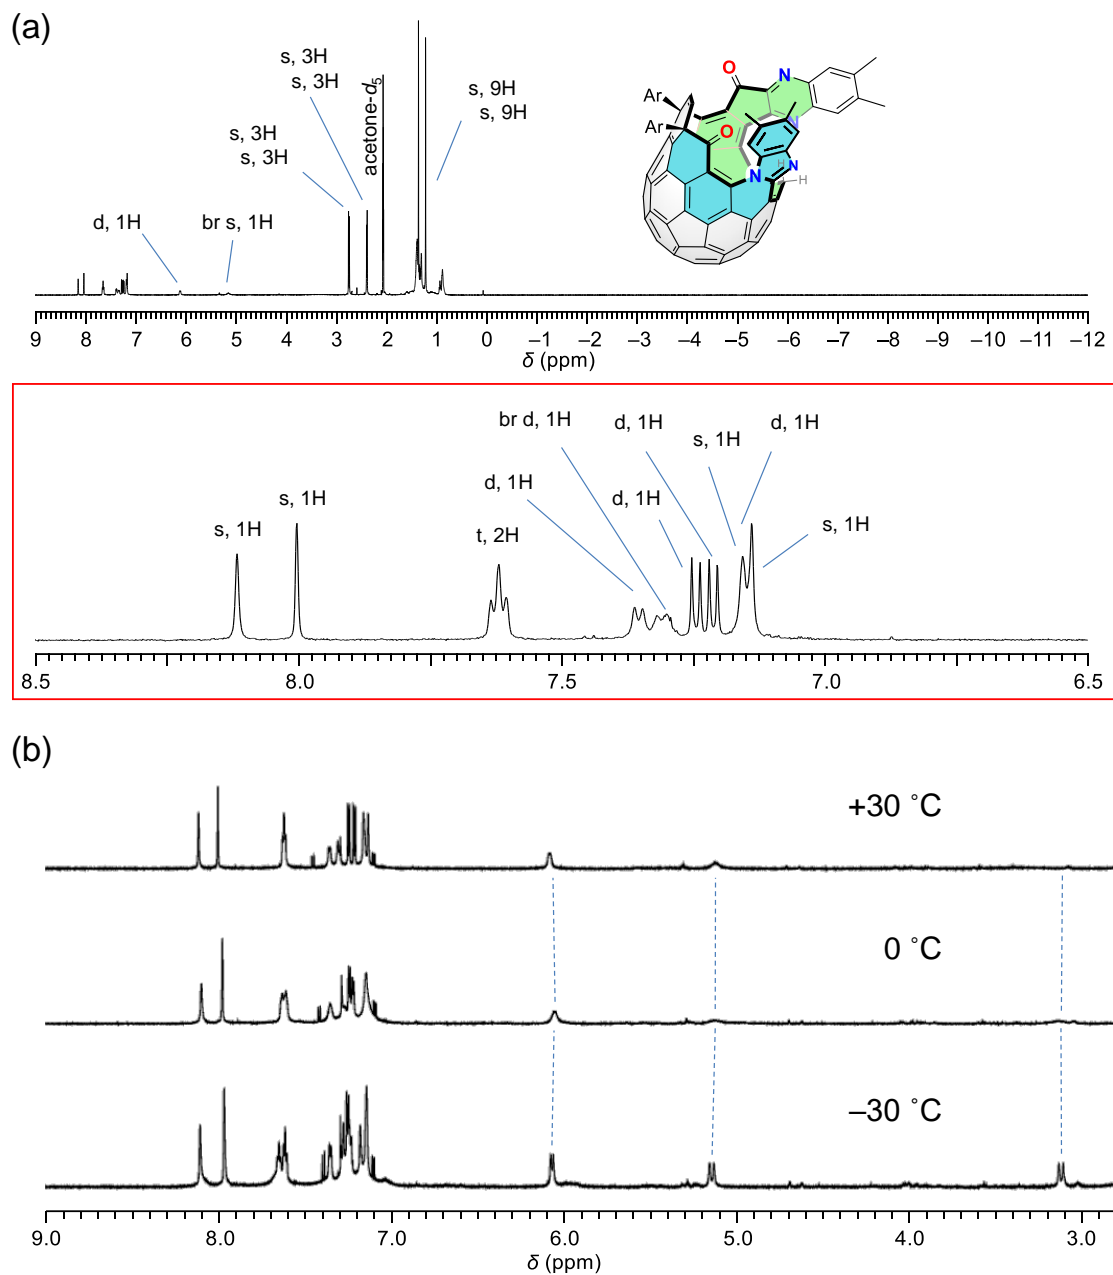

**Figure S1.**  $^1\text{H}$  NMR spectra (acetone- $d_6$ / $\text{CS}_2$  (1:5)) of **3** at (a) room temperature (500 MHz) and (b) variable temperatures at +30, 0, and  $-30$   $^\circ\text{C}$  (800 MHz). The signal broadening might be caused by the insertion/escape dynamics of the guest molecules such as  $\text{H}_2\text{O}$ ,  $\text{N}_2$ , and Ar.

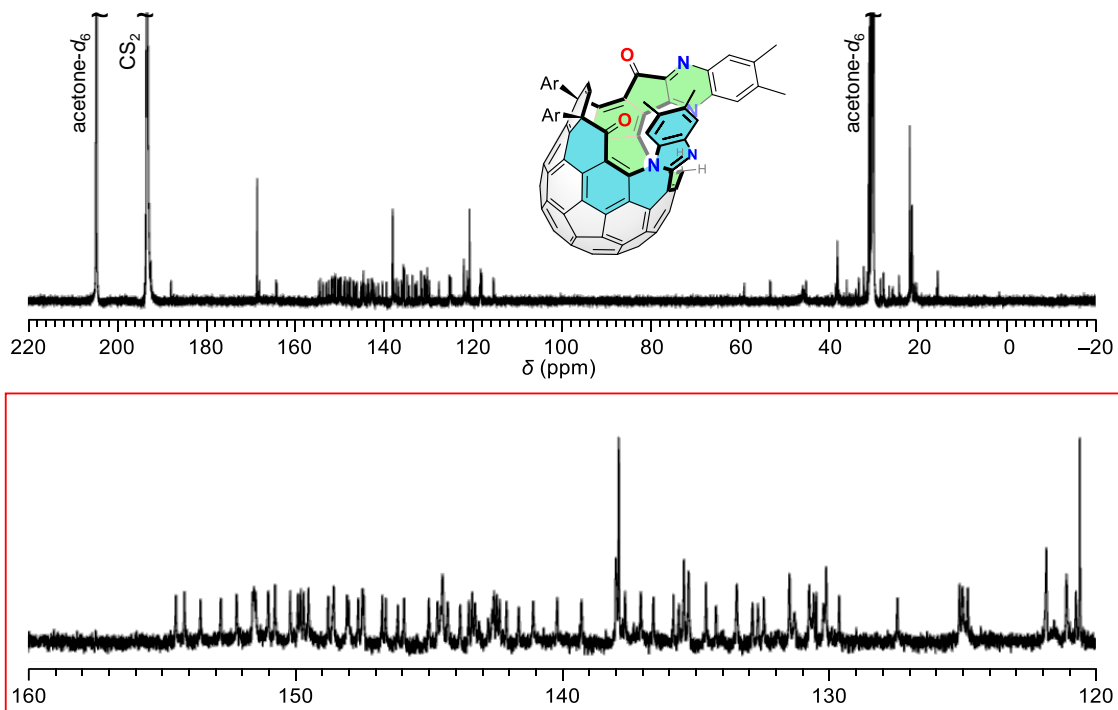

**Figure S2.**  $^{13}\text{C}$  NMR spectra (201 MHz, acetone- $d_6$ / $\text{CS}_2$  (1:5),  $-30\text{ }^\circ\text{C}$ ) of **3**.

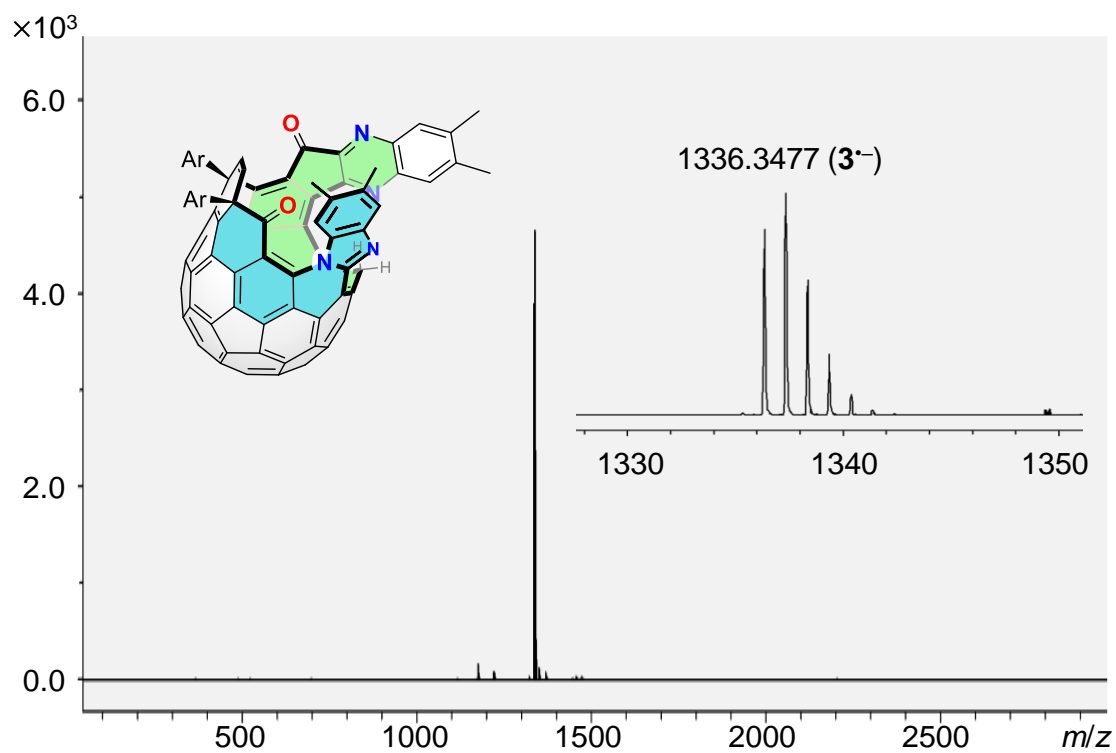

**Figure S3.** APCI mass spectra (negative ion mode) of **3**.

### 3.2. Synthesis of 4

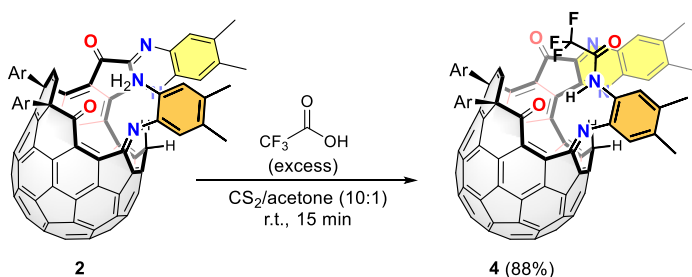

Powdery **1** (10.0 mg, 7.47  $\mu\text{mol}$ ) was placed into a 5-mL glass vial.  $\text{CS}_2$  (0.500 mL), acetone (super dehydrated, 50  $\mu\text{L}$ ), and trifluoroacetic acid (50  $\mu\text{L}$ ,  $\rho = 1.49 \text{ g/mL}$ , 653  $\mu\text{mol}$ , 88 equiv) were added and the resulting solution was stirred at room temperature for 15 min under air. After removal of the solvent, the crude mixture was purified by column chromatography using silica gel (toluene/ethyl acetate (50:1)) to give **4** (9.39 mg, 6.54  $\mu\text{mol}$ , 88%) as a brown powder.

**4**:  $^1\text{H}$  NMR (500 MHz, acetone- $d_6$ / $\text{CS}_2$  (1:5))  $\delta$  9.96 (s, 0.82H), 9.94 (s, 0.18H), 8.15 (s, 1H), 7.68 (t, 1H,  $J = 8.0 \text{ Hz}$ ), 7.61 (s, 1H), 7.603 (t, 0.82H,  $J = 8.0 \text{ Hz}$ ), 7.600 (t, 0.16H,  $J = 8.0 \text{ Hz}$ ), 7.461 (d, 1H,  $J = 10.9 \text{ Hz}$ ), 7.459 (d, 1H,  $J = 8.0 \text{ Hz}$ ), 7.42 (s, 1H), 7.25 (d, 1H,  $J = 8.0 \text{ Hz}$ ), 7.23 (s, 1H), 7.184 (d, 1H,  $J = 8.0 \text{ Hz}$ ), 7.175 (d, 1H,  $J = 8.0 \text{ Hz}$ ), 6.46 (d, 1H,  $J = 10.9 \text{ Hz}$ ), 3.93 (d, 0.82H,  $J = 20.6 \text{ Hz}$ ), 3.90 (d, 0.18H,  $J = 20.6 \text{ Hz}$ ), 2.79 (s, 0.54H), 2.78 (s, 2.56H), 2.68 (s, 0.54H), 2.65 (s, 2.56H), 2.43 (d, 0.82H,  $J = 20.6 \text{ Hz}$ ), 2.31 (d, 0.82H,  $J = 20.6 \text{ Hz}$ ), 2.14 (s, 3H), 1.23 (s, 1.62H), 1.22 (s, 7.38H), 1.16 (s, 1.62H), 1.15 (t, 7.38H),  $-10.97$  (br s, 0.76H) (A part of signals corresponding to the empty and encapsulated ones was separately observed.);  $^{13}\text{C}$  NMR (201 MHz, acetone- $d_6$ / $\text{CS}_2$  (1:5))  $\delta$  193.12 (confirmed by HMBC), 187.71, 187.64, 168.55, 168.53, 168.52, 168.51, 163.86, 163.71, 163.52, 163.40, 158.83, 158.65, 154.87 (q,  $^2J_{\text{CF}} = 38.2 \text{ Hz}$ ), 154.21, 154.20, 153.33, 153.08, 153.04, 153.00, 152.44, 152.35, 151.10, 150.98, 150.95, 150.91, 150.86, 150.79, 150.72, 149.95, 149.81, 149.80, 149.62, 149.58, 149.52, 149.28, 149.26, 149.22, 149.10, 149.01, 148.99, 148.82, 148.79, 148.37, 148.36, 147.34, 147.08, 147.00, 146.92, 146.86, 146.77, 146.72, 146.65, 146.64, 146.34, 146.31, 146.20, 146.13, 145.78, 145.74, 145.08, 145.05, 144.93, 144.84, 144.77, 144.69, 144.59, 144.59, 144.53, 144.26, 144.05, 143.99, 143.98, 143.97, 143.95, 143.85, 143.71, 143.55, 143.49, 143.35, 142.99, 142.01, 141.97, 141.92, 141.64, 141.63, 141.62, 141.52, 141.33, 141.28, 140.24, 139.76, 139.56, 139.35, 138.41, 138.40, 138.06, 138.03, 137.97, 137.86, 137.80, 137.69, 137.46, 137.40, 137.33, 137.11, 136.99, 136.85, 136.74, 136.43, 136.37, 136.23, 136.07, 135.77, 135.18, 135.01, 134.98, 134.87, 134.25, 133.47, 133.37, 133.22, 133.17, 133.06, 132.92, 132.89,



132.64, 132.47, 132.45, 132.43, 131.79, 131.69, 130.42, 130.00, 129.87, 129.36, 128.79, 127.94, 127.70, 125.66, 120.80, 120.79, 120.77, 120.69, 120.63, 120.02, 120.00, 117.89, 117.86, 117.86, 116.33 (q,  $^1J_{CF} = 289$  Hz), 60.41, 60.27, 53.46, 43.35, 43.19, 38.00, 37.99, 37.98, 37.96, 30.55, 30.54, 30.38, 30.36, 21.54, 21.15, 20.96, 19.90 (The carbon signals of the empty and encapsulated ones were separately observed. The sum of carbon signals must be 96 in theory. Observed 168 (for two components). The 16  $sp^2$ , 6  $sp^3$ , and 2 carbonyl carbon signals are overlapped.);  $^{19}F$  NMR (471 MHz, acetone- $d_6$ /CS $_2$  (1:5))  $\delta$  – 73.0; HRMS (APCI)  $m/z$ :  $[M]^-$  Calcd for C $_{100}$ H $_{45}$ F $_3$ N $_6$ O $_3$  (**4**) 1434.3511; Found 1434.3468.

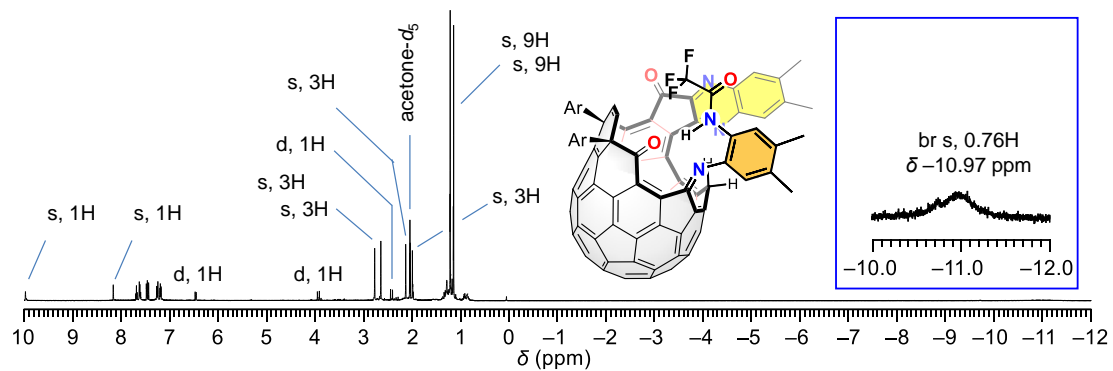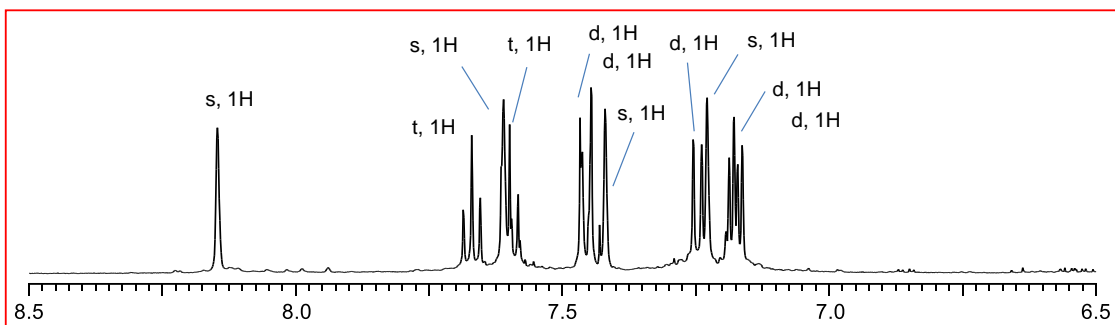

**Figure S4.**  $^1\text{H}$  NMR spectra (500 MHz, acetone- $d_6$ /CS $_2$  (1:5)) of **4**.

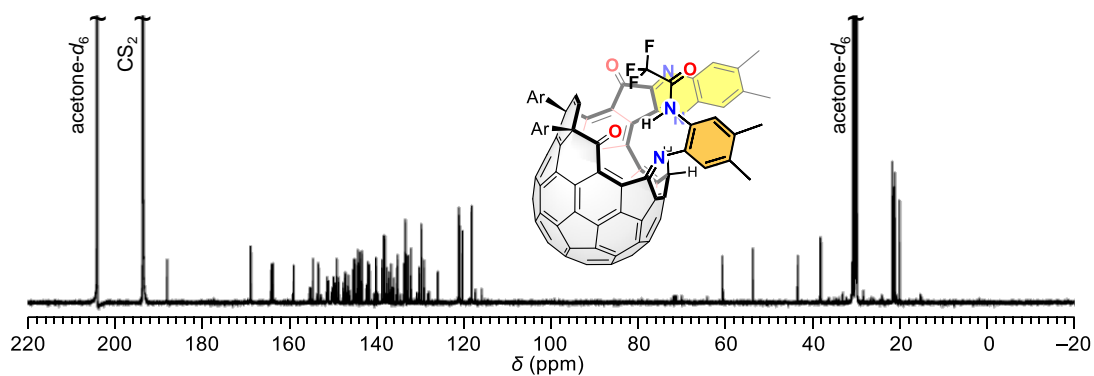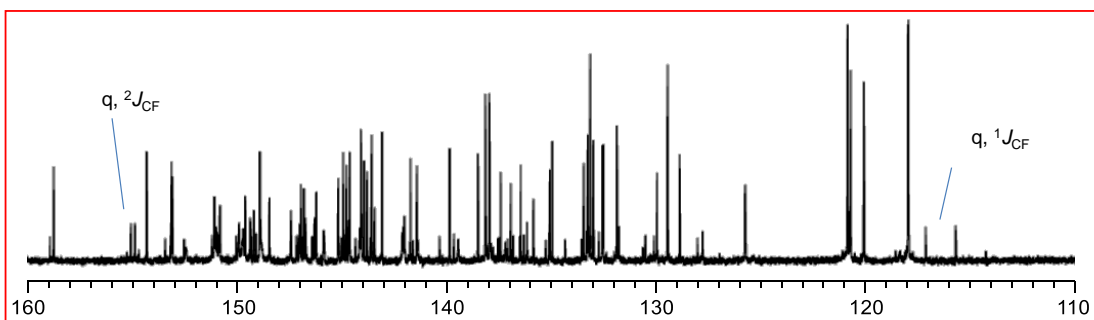

**Figure S5.**  $^{13}\text{C}$  NMR spectra (201 MHz, acetone- $d_6$ /CS $_2$  (1:5)) of **4**.

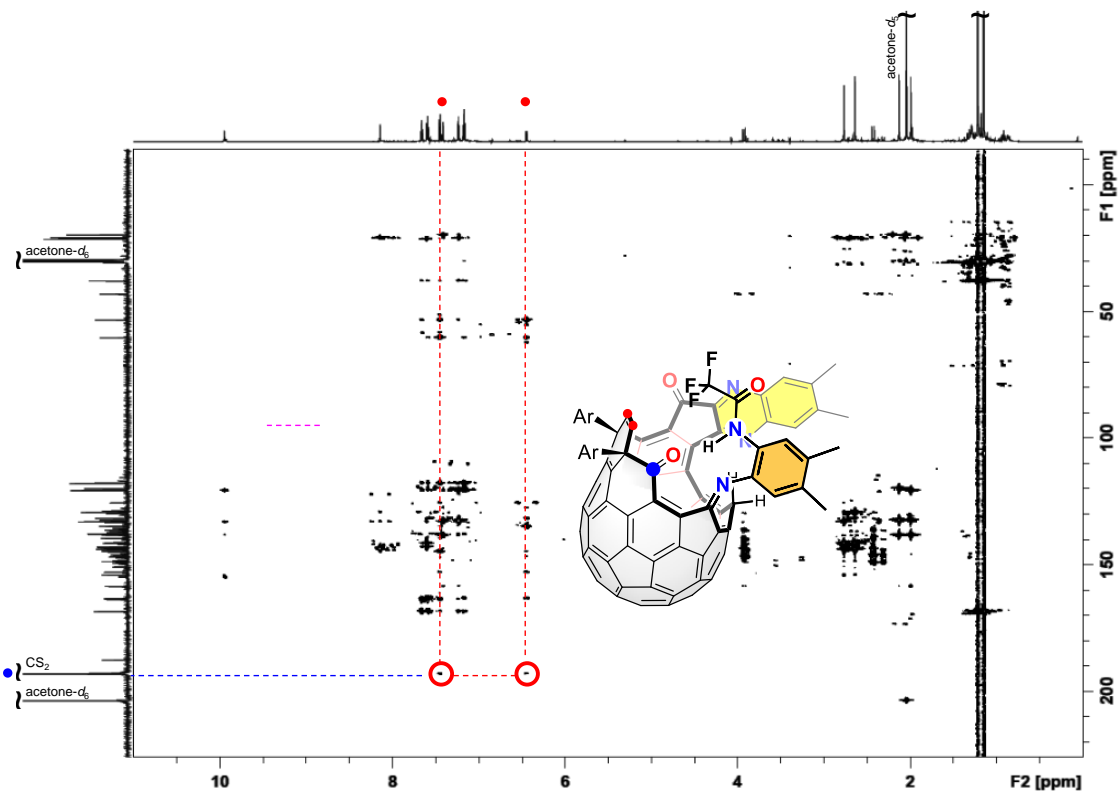

**Figure S6.** HMBC spectrum (800 MHz, acetone- $d_6$ /CS<sub>2</sub> (1:5)) of **4**.

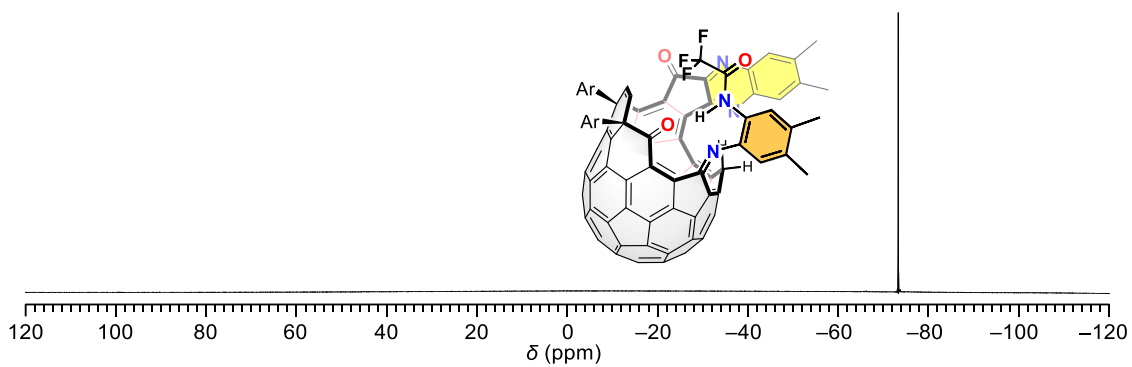

**Figure S7.** <sup>19</sup>F NMR spectrum (471 MHz, acetone- $d_6$ /CS<sub>2</sub> (1:5)) of **4**.

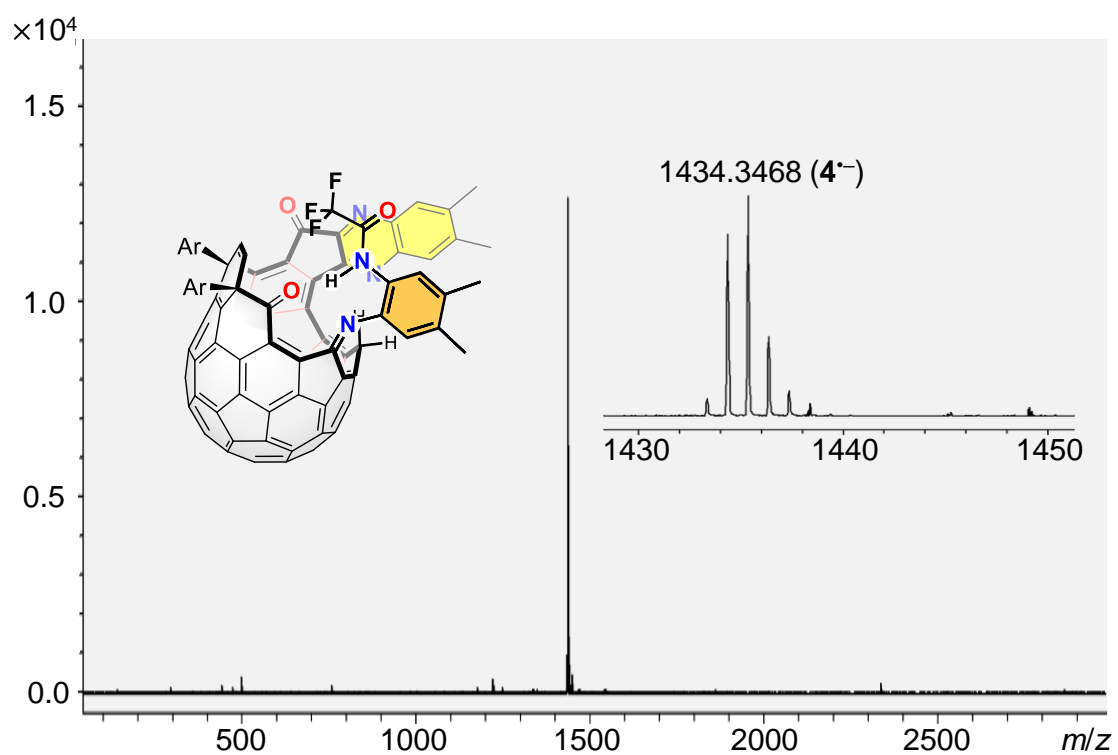

**Figure S8.** APCI mass spectra (negative ion mode) of **4**.

### 3.3. Synthesis of 5

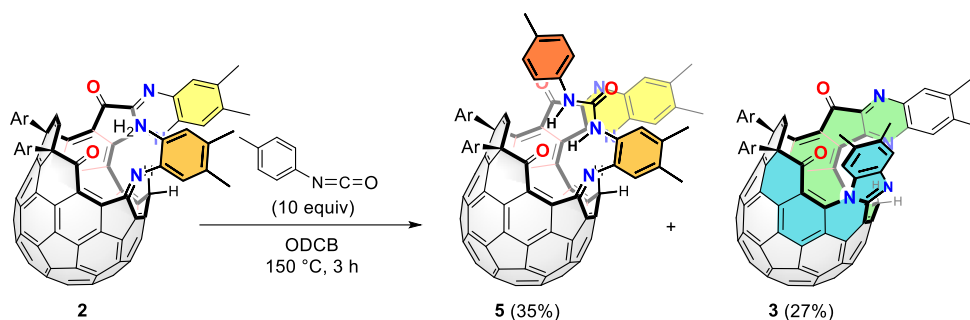

Powdery **2** (10.0 mg, 7.47  $\mu\text{mol}$ ) was placed into a 5-mL glass vial and degassed through three vacuum-Ar cycles. ODCB (0.500 mL) and *p*-tolyl isocyanate (9.21  $\mu\text{L}$ ,  $\rho = 1.06$  g/mL, 73.3  $\mu\text{mol}$ , 10 equiv) were added and the resulting solution was heated at 150  $^{\circ}\text{C}$  for 3 h (aluminum block heater). The crude mixture was purified by column chromatography using silica gel (toluene/ethyl acetate (50:1) to (20:1)) to give **3** (2.69 mg, 2.01  $\mu\text{mol}$ , 27%) followed by **5** (3.90 mg, 2.65  $\mu\text{mol}$ , 35%) as brown powders.

**5**:  $^1\text{H}$  NMR (500 MHz, acetone- $d_6$ /CS $_2$  (1:5))  $\delta$  8.93 (s, 0.84H), 8.88 (s, 0.16H), 8.22 (s, 1H), 7.64 (t, 1H,  $J = 8.0$  Hz), 7.610 (s, 1H), 7.605 (t, 0.84H,  $J = 8.0$  Hz), 7.60 (t, 0.16H,  $J = 8.0$  Hz), 7.56 (d, 0.84H,  $J = 10.3$  Hz), 7.54 (d, 0.16H,  $J = 10.3$  Hz), 7.49 (d, 1.68H,  $J = 8.0$  Hz), 7.48 (d, 0.32H,  $J = 8.0$  Hz), 7.41 (d, 1H,  $J = 8.0$  Hz), 7.33 (s, 0.84H), 7.32 (s, 0.16H), 7.24 (d, 1H,  $J = 8.0$  Hz), 7.22 (s, 1H), 7.204 (d, 1H,  $J = 8.0$  Hz), 7.199 (d, 1H,  $J = 8.0$  Hz), 7.10 (d, 2H,  $J = 8.0$  Hz), 7.03 (s, 0.84H), 7.02 (s, 0.16H), 6.45 (d, 0.84H,  $J = 10.3$  Hz), 6.43 (d, 0.16H,  $J = 10.3$  Hz), 4.05 (d, 0.84H,  $J = 20.6$  Hz), 4.02 (d, 0.84H,  $J = 20.6$  Hz), 2.76 (s, 3H), 2.64 (s, 3H), 2.47 (d, 0.84H,  $J = 20.6$  Hz), 2.38 (s, 3H), 2.37 (d, 0.16H,  $J = 20.6$  Hz), 1.86 (s, 2.52H), 1.85 (s, 0.48H), 1.23 (s, 1.62H), 1.219 (s, 7.56H), 1.215 (s, 1.44H), 1.19 (s, 7.56H), 1.18 (s, 1.44H),  $-10.97$  (br s, 0.62H) (A part of signals corresponding to the empty and encapsulated ones was separately observed.);  $^{13}\text{C}$  NMR (126 MHz, acetone- $d_6$ /CS $_2$  (1:5))  $\delta$  195.82, 187.73, 168.55, 163.63, 163.46, 155.19, 154.98, 154.13, 152.94, 152.35, 152.17, 151.42, 151.03, 150.92, 150.54, 149.73, 149.64, 149.57, 149.47, 149.29, 149.13, 148.96, 148.85, 148.53, 148.14, 147.31, 147.05, 146.86, 146.76, 146.61, 145.79, 144.93, 144.86, 144.67, 144.63, 144.15, 144.11, 144.00, 143.76, 143.65, 143.59, 143.36, 142.75, 142.03, 141.94, 141.84, 141.68, 141.65, 141.55, 141.39, 139.69, 138.81, 138.03, 137.88, 137.36, 137.27, 136.88, 136.72, 136.53, 136.50, 135.84, 135.64, 135.43, 134.45, 134.26, 133.33, 133.00, 132.85, 132.80, 132.16, 131.26, 129.94, 129.78, 129.30, 128.24, 126.95, 124.20, 121.35, 120.71, 120.67, 118.99, 118.57, 118.07, 117.94, 59.94, 53.38, 43.67, 43.54, 37.94, 37.91, 30.52, 30.40, 21.72, 21.51, 21.12, 21.01,

19.85 (The sum of carbon signals must be 100 in theory. Observed 97. The 3 sp<sup>2</sup> carbon signals are overlapped.); HRMS (APCI) *m/z*: [M+H]<sup>+</sup> Calcd for C<sub>106</sub>H<sub>54</sub>N<sub>7</sub>O<sub>3</sub> (**5**) 1472.4283; Found 1472.4227.

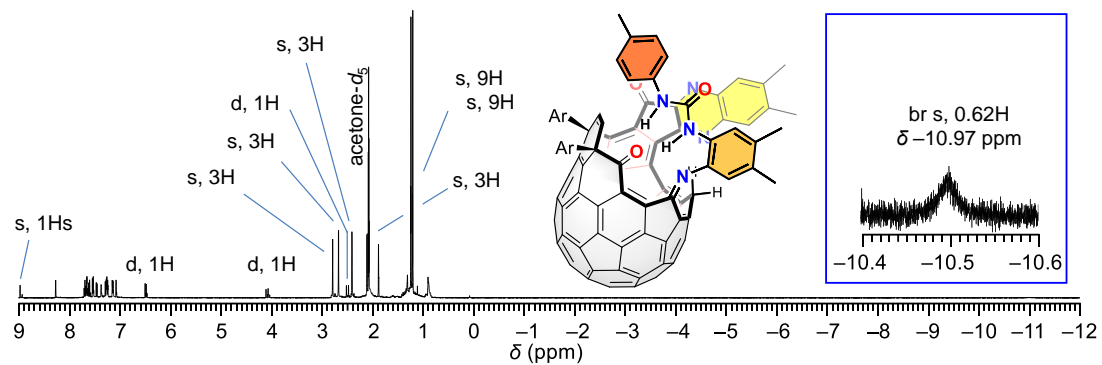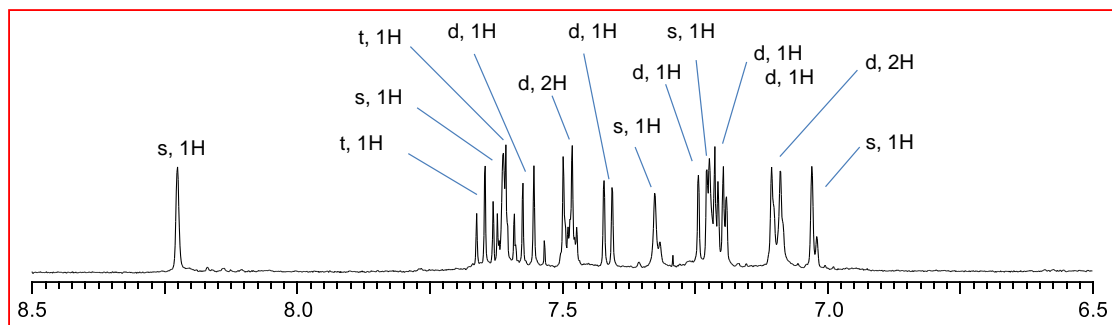

**Figure S9.**  $^1\text{H}$  NMR spectra (500 MHz, acetone- $d_6$ /CS $_2$  (1:5)) of **5**.

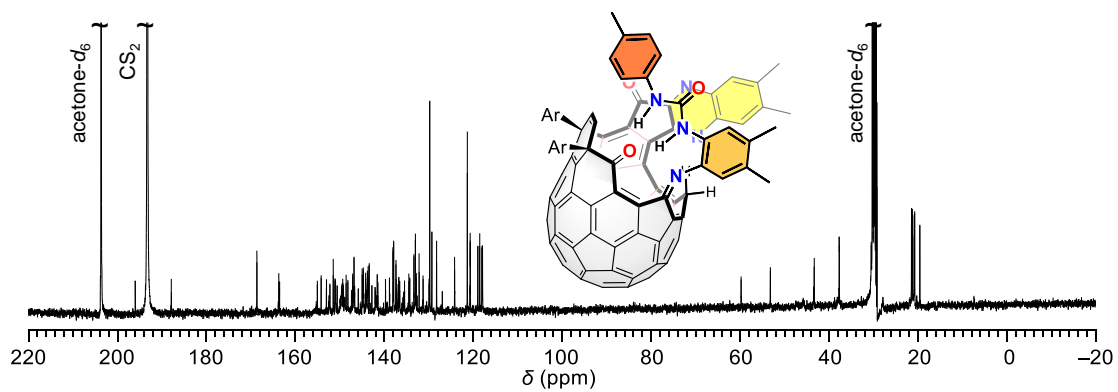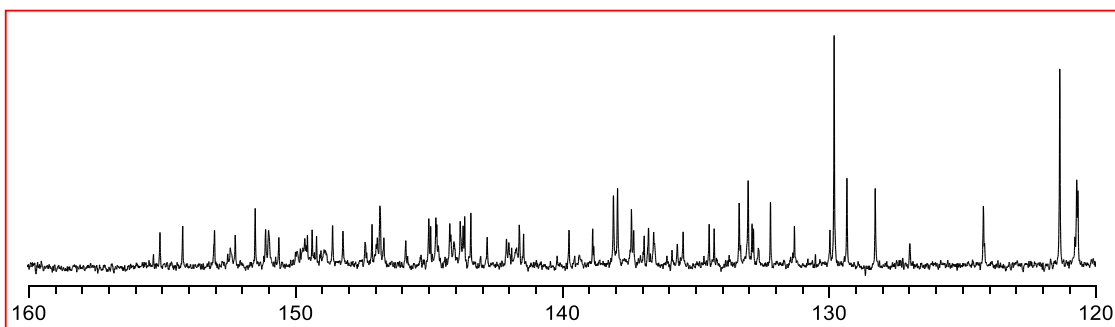

**Figure S10.**  $^{13}\text{C}$  NMR spectra (126 MHz, acetone- $d_6$ /CS $_2$  (1:5)) of **5**.

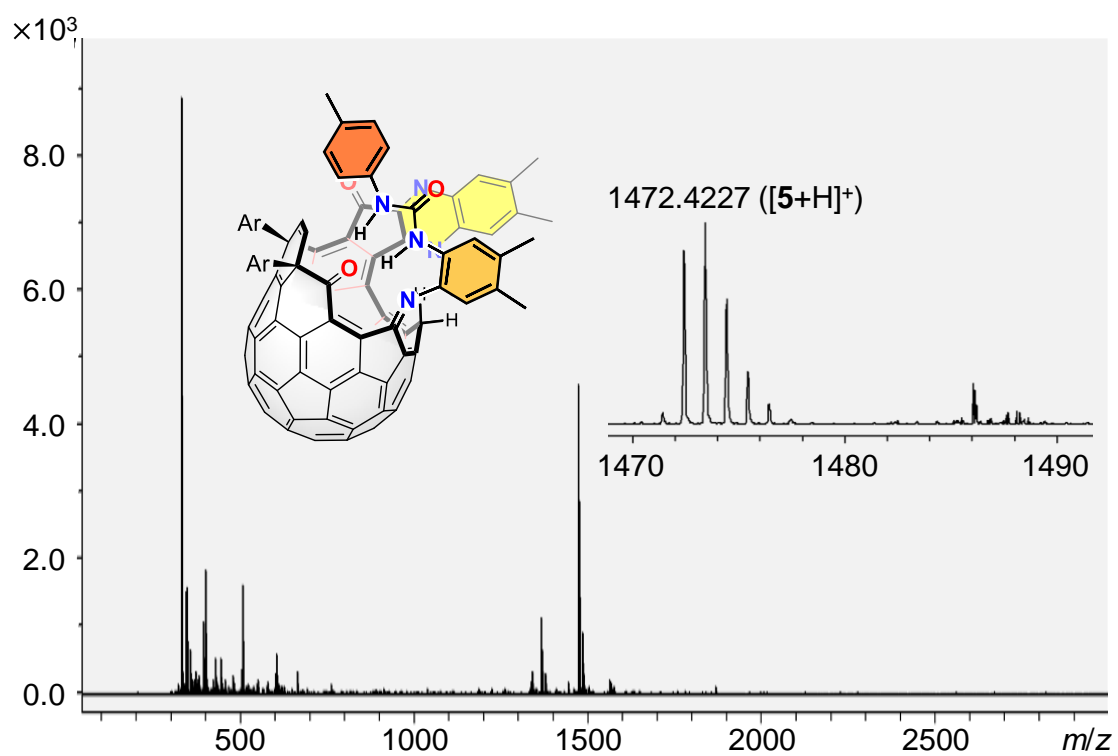

**Figure S11.** APCI mass spectra (positive ion mode) of **5**.



## 4. UV-Vis-NIR Absorption

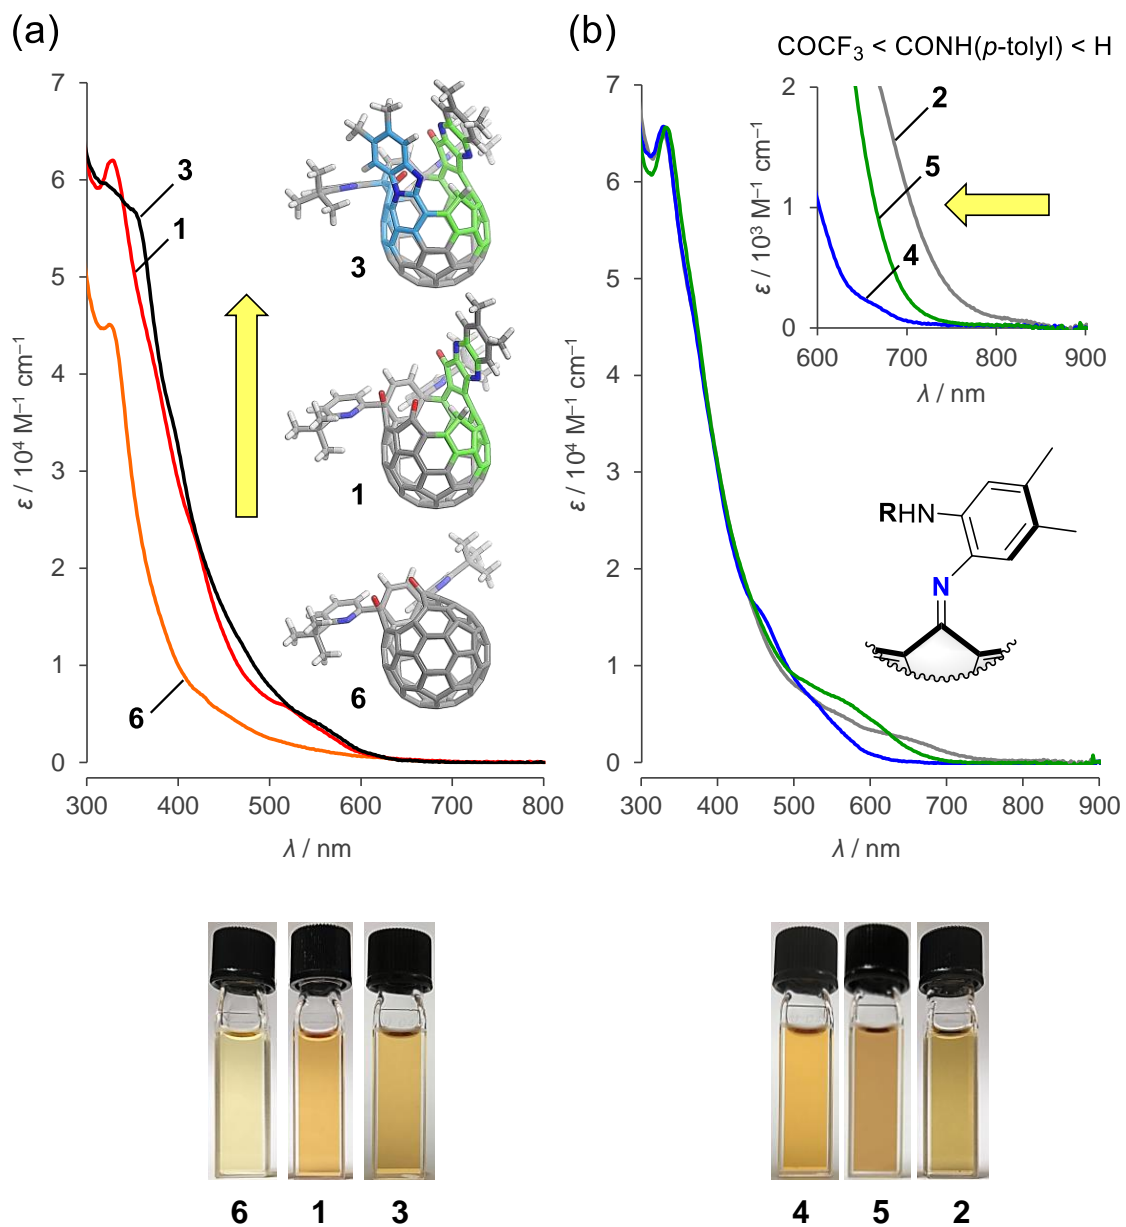

**Figure S12.** UV-vis-NIR absorption spectra of (a) 1, 3, and 6 and (b) 2, 4, and 5 (50  $\mu\text{M}$  in benzene).

## 5. Single Crystal X-Ray-Structure of $[(\text{H}_2\text{O})_{0.448(16)}(\text{N}_2)_{0.340(11)}]@3$ $\cdot(\text{acetone})_{2.22}\cdot(\text{CS}_2)_{0.22}$

Single crystals of **3** were obtained from a CS<sub>2</sub>/acetone solution by slow evaporation at room temperature. Intensity data were collected at 100 K on a Bruker Single Crystal CCD X-ray Diffractometer (SMART APEX II) with Mo K $\alpha$  radiation ( $\lambda = 0.71073$  Å) and graphite monochromator. A total of 35704 reflections were measured at the maximum  $2\theta$  angle of 49.8°, of which 13071 were independent reflections ( $R_{\text{int}} = 0.0458$ ). The structure was solved by direct methods (SHELXT-2014/5<sup>2</sup>) and refined by the full-matrix least-squares on  $F^2$  (SHELXL-2018/3<sup>2</sup>). This crystal contains acetone molecules, one of which was disordered with a CS<sub>2</sub> molecule at the same site. Thus, (O6–C105–C106–C107) and (S1–C108–S2) were placed and their occupancies were refined to be 0.779(4) and 0.221(4), respectively. The occupancies of other two acetone molecules, i.e., (O5–C102–C103–C104) and (O4–C99–C100–C101), were refined to be 0.883(5) and 0.548(5), respectively. The encapsulated H<sub>2</sub>O molecule is disordered with N<sub>2</sub> at the same site and their occupancies were refined to be 0.448(16) and 0.340(11), respectively. All non-hydrogen atoms were refined anisotropically. All hydrogen atoms were placed using AFIX instructions except for the encapsulated H<sub>2</sub>O molecule. The CS<sub>2</sub> molecule disordered with one of the acetone molecules were refined using SIMU and DFIX instructions. The encapsulated H<sub>2</sub>O and N<sub>2</sub> molecules were refined using SIMU and DFIX instructions. The crystal data are as follows: C<sub>104.85</sub>H<sub>58.16</sub>N<sub>6.68</sub>O<sub>4.66</sub>S<sub>0.44</sub>; FW = 1500.15, crystal size 0.13 × 0.09 × 0.08 mm<sup>3</sup>, monoclinic,  $P2_1/n$ ,  $a = 15.004(4)$  Å,  $b = 17.383(5)$  Å,  $c = 28.473(8)$  Å,  $\beta = 91.101(4)^\circ$ ,  $V = 7425(4)$  Å<sup>3</sup>,  $Z = 4$ ,  $D_c = 1.342$  g cm<sup>-3</sup>. The refinement converged to  $R_1 = 0.0519$ ,  $wR_2 = 0.1236$  ( $I > 2\sigma(I)$ ), GOF = 1.017. The data was deposited at the Cambridge Crystallographic Data Centre (CCDC 2236614).

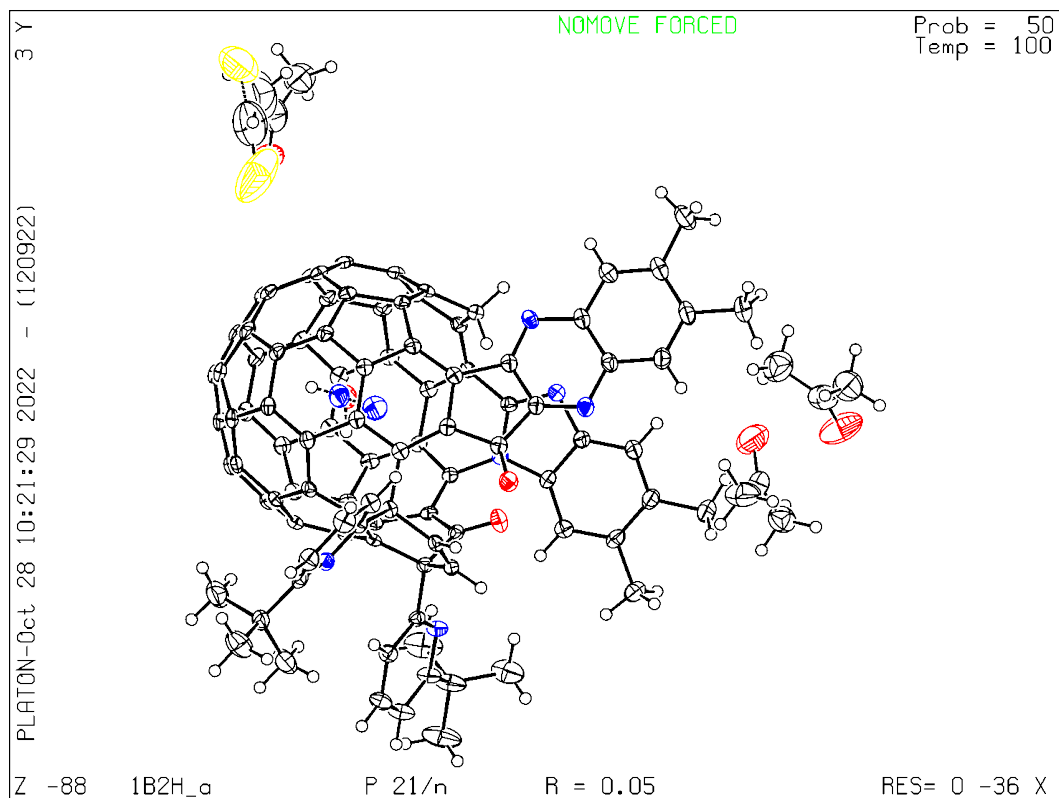

**Figure S13.** Single crystal X-ray structure of  $[\{(H_2O)_{0.448(16)}(N_2)_{0.340(11)}\}@3] \cdot (acetone)_{2.22} \cdot (CS_2)_{0.22}$ . Thermal ellipsoids are shown at 50% probability.

## 6. DFT Calculations

### 6.1. Optimized Structures of 1 and 2

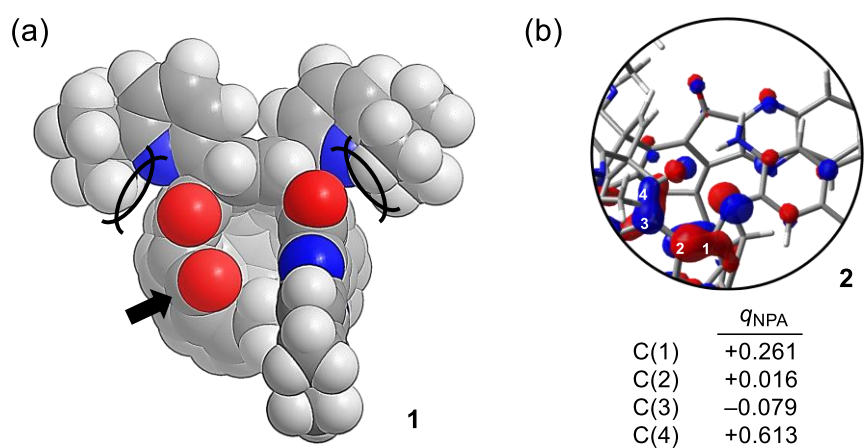

**Figure S14.** (a) Space-filling model of **1** and (b) the LUMO+1 of **2** and natural charges  $q_{\text{NPA}}$  of selected carbon atoms. The calculations were performed at the B3LYP-D3/6-31G(d) level of theory.

**Table S1.** Optimized structure of **1** (B3LYP-D3/6-31G(d))

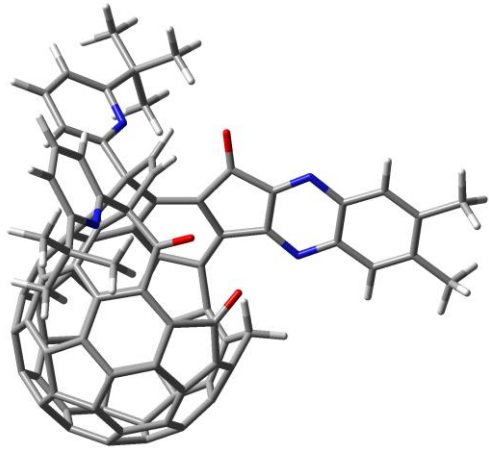

Standard orientation:

| Center Number | Atomic Number | Atomic Type | Coordinates (Angstroms) |           |           |
|---------------|---------------|-------------|-------------------------|-----------|-----------|
|               |               |             | X                       | Y         | Z         |
| 1             | 6             | 0           | 0.005463                | 3.220738  | 1.589752  |
| 2             | 6             | 0           | 0.735428                | 3.366164  | 0.486717  |
| 3             | 6             | 0           | 0.424358                | 2.728688  | -0.849704 |
| 4             | 6             | 0           | 1.387370                | 1.562405  | -1.203653 |
| 5             | 6             | 0           | 2.527633                | 1.177372  | -0.486190 |
| 6             | 6             | 0           | 3.454352                | 1.949221  | 0.425930  |
| 7             | 6             | 0           | 4.347269                | 0.916495  | 1.058107  |
| 8             | 6             | 0           | 4.077738                | -0.351174 | 0.464931  |
| 9             | 6             | 0           | 2.087911                | -3.052891 | 1.039027  |
| 10            | 6             | 0           | 0.794411                | -3.680269 | 1.541832  |
| 11            | 6             | 0           | -0.150078               | -3.118999 | 2.384538  |
| 12            | 6             | 0           | -0.118962               | -1.698194 | 2.915263  |
| 13            | 6             | 0           | -1.570091               | -1.209578 | 2.780559  |
| 14            | 6             | 0           | -1.975591               | 0.055656  | 2.356222  |
| 15            | 6             | 0           | -1.184045               | 1.286412  | 2.660550  |
| 16            | 6             | 0           | -1.297624               | 2.475086  | 1.649218  |
| 17            | 7             | 0           | -3.320913               | 2.854721  | 2.967564  |
| 18            | 8             | 0           | 3.590053                | 3.151468  | 0.548965  |
| 19            | 8             | 0           | -0.507677               | 1.387619  | 3.661375  |
| 20            | 7             | 0           | 1.776047                | 3.966450  | -2.431764 |
| 21            | 6             | 0           | -1.723692               | 1.952163  | 0.296303  |
| 22            | 6             | 0           | -1.388482               | 1.435190  | -2.063075 |
| 23            | 7             | 0           | 5.260364                | 1.121222  | 1.972655  |
| 24            | 6             | 0           | -2.892746               | 1.098199  | 0.297399  |
| 25            | 6             | 0           | 0.961369                | 0.699148  | -2.262729 |
| 26            | 8             | 0           | 0.879811                | -1.061676 | 3.174204  |
| 27            | 6             | 0           | -0.777798               | -0.202127 | -3.789346 |
| 28            | 6             | 0           | 2.030715                | 4.948249  | -3.313146 |
| 29            | 6             | 0           | 0.030824                | -1.384839 | -4.038657 |
| 30            | 6             | 0           | 0.557641                | 3.834719  | -1.912501 |
| 31            | 6             | 0           | -0.370390               | 0.789356  | -2.875218 |
| 32            | 6             | 0           | -2.709253               | 0.977992  | -2.146246 |
| 33            | 6             | 0           | -0.974055               | 2.103643  | -0.849320 |
| 34            | 6             | 0           | 1.204566                | -1.544329 | -3.330194 |
| 35            | 6             | 0           | -3.112310               | -0.045327 | -3.076674 |
| 36            | 6             | 0           | 2.500776                | -1.073961 | -1.452153 |
| 37            | 6             | 0           | -2.157441               | -0.621661 | -3.903779 |
| 38            | 6             | 0           | -3.475694               | 0.796062  | -0.932105 |
| 39            | 6             | 0           | -3.069441               | 0.159239  | 1.405204  |
| 40            | 6             | 0           | 1.657493                | -0.511233 | -2.455061 |
| 41            | 6             | 0           | -2.476143               | 4.749330  | 1.765760  |
| 42            | 6             | 0           | -2.413043               | 3.411221  | 2.167217  |
| 43            | 6             | 0           | 0.767424                | -3.908846 | -2.968781 |
| 44            | 6             | 0           | -3.902837               | -0.955819 | 1.199491  |
| 45            | 6             | 0           | -4.340890               | -0.345106 | -1.123257 |
| 46            | 6             | 0           | -3.533376               | 5.516670  | 2.244123  |
| 47            | 6             | 0           | 3.020363                | -0.179366 | -0.536073 |
| 48            | 6             | 0           | -2.198043               | -2.053882 | -4.163862 |
| 49            | 6             | 0           | 1.023648                | 5.837133  | -3.708483 |
| 50            | 6             | 0           | 0.524969                | -4.792395 | -1.860571 |
| 51            | 6             | 0           | -3.173749               | -2.850877 | -3.558407 |
| 52            | 6             | 0           | 2.310368                | -2.551418 | -1.521687 |
| 53            | 6             | 0           | -4.479317               | 4.936467  | 3.091447  |
| 54            | 6             | 0           | 3.480801                | 5.000753  | -3.804613 |
| 55            | 6             | 0           | -0.501607               | 4.687835  | -2.238988 |
| 56            | 6             | 0           | 2.047205                | -3.394461 | -0.450290 |
| 57            | 6             | 0           | -4.346109               | 3.586577  | 3.437964  |
| 58            | 6             | 0           | -4.132849               | -0.867589 | -2.456781 |
| 59            | 6             | 0           | -0.861505               | -5.221550 | -1.918965 |
| 60            | 6             | 0           | -0.954745               | -5.130398 | 0.533710  |
| 61            | 6             | 0           | 1.604314                | -2.811549 | -2.773676 |
| 62            | 6             | 0           | -3.561131               | -2.236374 | 1.763890  |
| 63            | 6             | 0           | -0.831999               | -2.524062 | -4.253252 |
| 64            | 6             | 0           | -2.804859               | -4.137293 | -2.992389 |
| 65            | 6             | 0           | 1.126202                | -4.497498 | -0.632105 |
| 66            | 6             | 0           | -0.253597               | 5.700503  | -3.160574 |
| 67            | 6             | 0           | -2.360757               | -2.352004 | 2.454568  |
| 68            | 6             | 0           | 0.367309                | -4.675126 | 0.589387  |
| 69            | 6             | 0           | -1.481169               | -4.583949 | -3.067626 |
| 70            | 6             | 0           | -0.472195               | -3.763659 | -3.713743 |
| 71            | 6             | 0           | -1.523115               | -3.520209 | 2.261804  |
| 72            | 6             | 0           | -4.162480               | -2.244173 | -2.683639 |
| 73            | 6             | 0           | -4.404508               | -3.153253 | -1.576514 |
| 74            | 6             | 0           | -4.566875               | -1.208742 | -0.061261 |
| 75            | 6             | 0           | -2.967395               | -4.939337 | -0.662217 |
| 76            | 6             | 0           | -4.607265               | -2.642909 | -0.288733 |
| 77            | 6             | 0           | 3.835650                | 3.632326  | -4.429042 |
| 78            | 6             | 0           | -3.986782               | -3.282536 | 0.850991  |
| 79            | 6             | 0           | -1.934536               | -4.534998 | 1.405148  |
| 80            | 6             | 0           | -1.588545               | -5.394845 | -0.742512 |
| 81            | 6             | 0           | -3.182780               | -4.409357 | 0.669541  |
| 82            | 6             | 0           | -3.565981               | -4.321848 | -1.766452 |
| 83            | 6             | 0           | 4.389264                | 5.254389  | -2.578611 |
| 84            | 6             | 0           | 3.709018                | 6.107859  | -4.846086 |
| 85            | 6             | 0           | -5.323714               | 2.824056  | 4.338636  |
| 86            | 6             | 0           | -6.405885               | 3.739832  | 4.933931  |
| 87            | 6             | 0           | -4.526987               | 2.165570  | 5.487252  |
| 88            | 6             | 0           | -6.000215               | 1.723005  | 3.489433  |
| 89            | 6             | 0           | 5.943443                | -0.006522 | 2.345080  |
| 90            | 7             | 0           | 4.731376                | -1.450052 | 0.771360  |
| 91            | 6             | 0           | 5.683504                | -1.284622 | 1.742882  |
| 92            | 6             | 0           | 6.437634                | -2.400597 | 2.169299  |
| 93            | 6             | 0           | 6.937659                | 0.087893  | 3.345584  |
| 94            | 6             | 0           | 7.661594                | -1.014752 | 3.754361  |
| 95            | 6             | 0           | 7.405474                | -2.290109 | 3.149455  |
| 96            | 6             | 0           | 8.190506                | -3.502150 | 3.584970  |
| 97            | 6             | 0           | 8.714227                | -0.884275 | 4.826988  |

|     |   |   |           |           |           |     |   |   |           |           |          |
|-----|---|---|-----------|-----------|-----------|-----|---|---|-----------|-----------|----------|
| 98  | 1 | 0 | 0.322852  | 3.681625  | 2.519747  | 117 | 1 | 0 | -7.031468 | 4.193804  | 4.156325 |
| 99  | 1 | 0 | 1.644444  | 3.950421  | 0.510423  | 118 | 1 | 0 | -5.968398 | 4.543565  | 5.537960 |
| 100 | 1 | 0 | 2.980930  | -3.461122 | 1.528570  | 119 | 1 | 0 | -7.064879 | 3.156351  | 5.586063 |
| 101 | 1 | 0 | 2.104504  | -1.979773 | 1.230642  | 120 | 1 | 0 | -5.198269 | 1.569435  | 6.116877 |
| 102 | 1 | 0 | -1.718558 | 5.163443  | 1.108904  | 121 | 1 | 0 | -4.050472 | 2.924051  | 6.119459 |
| 103 | 1 | 0 | -3.622667 | 6.562546  | 1.961906  | 122 | 1 | 0 | -3.742994 | 1.514404  | 5.092022 |
| 104 | 1 | 0 | 1.223577  | 6.623897  | -4.425949 | 123 | 1 | 0 | -6.687964 | 1.136191  | 4.110094 |
| 105 | 1 | 0 | -5.301828 | 5.530874  | 3.470372  | 124 | 1 | 0 | -5.254056 | 1.046727  | 3.063386 |
| 106 | 1 | 0 | -1.480387 | 4.554108  | -1.789680 | 125 | 1 | 0 | -6.575312 | 2.159995  | 2.664066 |
| 107 | 1 | 0 | -1.048149 | 6.382426  | -3.452551 | 126 | 1 | 0 | 6.228767  | -3.356531 | 1.696917 |
| 108 | 1 | 0 | 4.886202  | 3.621799  | -4.742839 | 127 | 1 | 0 | 7.110815  | 1.066253  | 3.784524 |
| 109 | 1 | 0 | 3.214729  | 3.429000  | -5.310088 | 128 | 1 | 0 | 8.050421  | -3.706397 | 4.654120 |
| 110 | 1 | 0 | 3.676751  | 2.827492  | -3.706335 | 129 | 1 | 0 | 9.267515  | -3.358533 | 3.430823 |
| 111 | 1 | 0 | 5.443868  | 5.229460  | -2.878771 | 130 | 1 | 0 | 7.886336  | -4.393370 | 3.029030 |
| 112 | 1 | 0 | 4.222845  | 4.498420  | -1.805964 | 131 | 1 | 0 | 8.493015  | -1.529310 | 5.686854 |
| 113 | 1 | 0 | 4.185375  | 6.238290  | -2.138968 | 132 | 1 | 0 | 8.784935  | 0.145293  | 5.188478 |
| 114 | 1 | 0 | 4.756596  | 6.102688  | -5.166553 | 133 | 1 | 0 | 9.703996  | -1.180625 | 4.456803 |
| 115 | 1 | 0 | 3.495503  | 7.102206  | -4.436339 |     |   |   |           |           |          |
| 116 | 1 | 0 | 3.088514  | 5.961741  | -5.738535 |     |   |   |           |           |          |

The total electronic energy was calculated to be -3896.03493370 Hartree.

**Table S2.** Optimized structure of **2** (B3LYP-D3/6-31G(d))

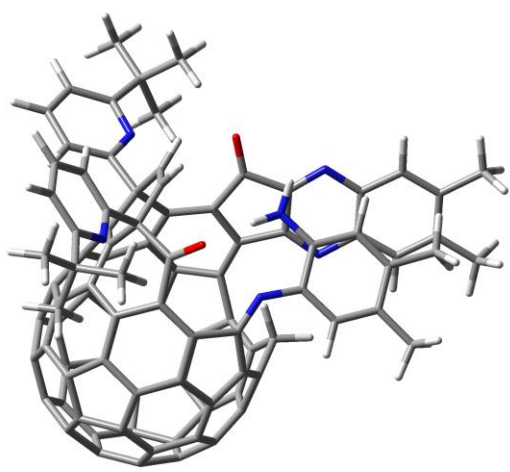

Standard orientation:

| Center Number | Atomic Number | Atomic Type | Coordinates (Angstroms) |           |           |    |   |   |           |           |           |
|---------------|---------------|-------------|-------------------------|-----------|-----------|----|---|---|-----------|-----------|-----------|
|               |               |             | X                       | Y         | Z         |    |   |   |           |           |           |
| 1             | 6             | 0           | -0.685981               | 2.971190  | 1.908816  | 22 | 6 | 0 | -2.423515 | 1.556653  | -1.757956 |
| 2             | 6             | 0           | -0.166826               | 3.386538  | 0.756190  | 23 | 7 | 0 | 5.077806  | 1.965692  | 0.622033  |
| 3             | 6             | 0           | -0.621677               | 2.932388  | -0.613471 | 24 | 6 | 0 | -3.415575 | 0.599863  | 0.703112  |
| 4             | 6             | 0           | 0.420420                | 2.029477  | -1.327262 | 25 | 6 | 0 | -0.067708 | 1.293975  | -2.455747 |
| 5             | 6             | 0           | 1.731670                | 1.756891  | -0.901065 | 26 | 6 | 0 | -1.908546 | 0.353453  | -3.836099 |
| 6             | 6             | 0           | 2.720420                | 2.539799  | -0.060372 | 27 | 6 | 0 | 0.221927  | 5.802998  | -2.762978 |
| 7             | 6             | 0           | 3.944236                | 1.665269  | 0.042931  | 28 | 6 | 0 | -0.995167 | -0.608092 | -4.434100 |
| 8             | 6             | 0           | 3.707227                | 0.449663  | -0.659770 | 29 | 6 | 0 | -0.831542 | 4.210515  | -1.448148 |
| 9             | 6             | 0           | 2.192400                | -2.607263 | -0.157242 | 30 | 6 | 0 | -1.489654 | 1.240852  | -2.824065 |
| 10            | 6             | 0           | 1.134096                | -3.535097 | 0.435726  | 31 | 6 | 0 | -3.656227 | 0.891454  | -1.719717 |
| 11            | 6             | 0           | 0.302851                | -3.299261 | 1.525503  | 32 | 6 | 0 | -1.898418 | 2.089596  | -0.521171 |
| 12            | 6             | 0           | 0.188809                | -2.037398 | 2.353027  | 33 | 6 | 0 | 0.302764  | -0.661587 | -3.970843 |
| 13            | 6             | 0           | -1.295460               | -1.773278 | 2.448052  | 34 | 6 | 0 | -4.067233 | -0.026296 | -2.751062 |
| 14            | 6             | 0           | -1.984969               | -0.555897 | 2.375706  | 35 | 6 | 0 | 1.847162  | -0.268503 | -2.278155 |
| 15            | 6             | 0           | -1.400417               | 0.746478  | 2.800133  | 36 | 6 | 0 | -3.206730 | -0.283786 | -3.809827 |
| 16            | 6             | 0           | -1.849132               | 2.027002  | 2.022279  | 37 | 6 | 0 | -4.156533 | 0.389312  | -0.458082 |
| 17            | 7             | 0           | -3.660893               | 1.880551  | 3.653614  | 38 | 6 | 0 | -3.236660 | -0.514963 | 1.635863  |
| 18            | 8             | 0           | 2.662313                | 3.682983  | 0.352596  | 39 | 6 | 0 | 0.750165  | 0.282046  | -2.996595 |
| 19            | 8             | 0           | -0.626661               | 0.853531  | 3.732431  | 40 | 6 | 0 | -3.314141 | 4.032632  | 2.655374  |
| 20            | 7             | 0           | 0.261591                | 4.656931  | -2.063464 | 41 | 6 | 0 | -2.987289 | 2.684381  | 2.833217  |
| 21            | 6             | 0           | -2.409902               | 1.640106  | 0.676056  | 42 | 6 | 0 | 0.303278  | -3.092994 | -3.987461 |
|               |               |             |                         |           |           | 43 | 6 | 0 | -3.912872 | -1.717291 | 1.355118  |
|               |               |             |                         |           |           | 44 | 6 | 0 | -4.861526 | -0.844371 | -0.721299 |
|               |               |             |                         |           |           | 45 | 6 | 0 | -4.387519 | 4.536439  | 3.382900  |
|               |               |             |                         |           |           | 46 | 6 | 0 | 2.403441  | 0.548639  | -1.313929 |
|               |               |             |                         |           |           | 47 | 6 | 0 | -3.081131 | -1.640152 | -4.326207 |
|               |               |             |                         |           |           | 48 | 6 | 0 | -0.964346 | 6.540411  | -2.865520 |
|               |               |             |                         |           |           | 49 | 6 | 0 | 0.410153  | -4.162857 | -3.031297 |
|               |               |             |                         |           |           | 50 | 6 | 0 | -3.792966 | -2.685114 | -3.730354 |
|               |               |             |                         |           |           | 51 | 6 | 0 | 1.877144  | -1.721440 | -2.593893 |
|               |               |             |                         |           |           | 52 | 6 | 0 | -5.090351 | 3.695604  | 4.248295  |
|               |               |             |                         |           |           | 53 | 6 | 0 | 1.557150  | 6.209934  | -3.394725 |
|               |               |             |                         |           |           | 54 | 6 | 0 | -2.052345 | 4.891907  | -1.484394 |
|               |               |             |                         |           |           | 55 | 6 | 0 | 1.941997  | -2.744769 | -1.657371 |
|               |               |             |                         |           |           | 56 | 6 | 0 | -4.699647 | 2.356133  | 4.362712  |
|               |               |             |                         |           |           | 57 | 6 | 0 | -4.822005 | -1.106073 | -2.143944 |
|               |               |             |                         |           |           | 58 | 6 | 0 | -0.881832 | -4.822150 | -2.945630 |
|               |               |             |                         |           |           | 59 | 6 | 0 | -0.525726 | -5.120257 | -0.531367 |
|               |               |             |                         |           |           | 60 | 6 | 0 | 0.990879  | -1.906475 | -3.738230 |
|               |               |             |                         |           |           | 61 | 6 | 0 | -3.271074 | -2.980157 | 1.601899  |
|               |               |             |                         |           |           | 62 | 6 | 0 | -1.701625 | -1.836428 | -4.717842 |
|               |               |             |                         |           |           | 63 | 6 | 0 | -3.133903 | -3.955502 | -3.478174 |
|               |               |             |                         |           |           | 64 | 6 | 0 | 1.176465  | -3.950491 | -1.878869 |
|               |               |             |                         |           |           | 65 | 6 | 0 | -2.109040 | 6.074652  | -2.215695 |

|     |   |   |           |           |           |     |   |   |           |           |           |
|-----|---|---|-----------|-----------|-----------|-----|---|---|-----------|-----------|-----------|
| 66  | 6 | 0 | -1.955882 | -2.976830 | 2.053153  | 111 | 1 | 0 | -2.743230 | 4.652403  | 1.971832  |
| 67  | 6 | 0 | 0.692851  | -4.433454 | -0.600453 | 112 | 1 | 0 | -4.678818 | 5.578519  | 3.279010  |
| 68  | 6 | 0 | -1.795901 | -4.138120 | -3.843795 | 113 | 1 | 0 | -1.003484 | 7.460324  | -3.436871 |
| 69  | 6 | 0 | -1.062731 | -3.059800 | -4.482621 | 114 | 1 | 0 | -5.925914 | 4.083504  | 4.818315  |
| 70  | 6 | 0 | -0.997588 | -3.924432 | 1.529954  | 115 | 1 | 0 | -2.921448 | 4.502004  | -0.964675 |
| 71  | 6 | 0 | -4.683282 | -2.412502 | -2.614947 | 116 | 1 | 0 | -3.038942 | 6.633751  | -2.281497 |
| 72  | 6 | 0 | -4.573662 | -3.511181 | -1.671186 | 117 | 1 | 0 | 3.034351  | 5.290354  | -4.709561 |
| 73  | 6 | 0 | -4.748433 | -1.888294 | 0.184828  | 118 | 1 | 0 | 1.358676  | 4.858767  | -5.109068 |
| 74  | 6 | 0 | -2.731778 | -5.122163 | -1.339973 | 119 | 1 | 0 | 2.144113  | 4.128219  | -3.696512 |
| 75  | 6 | 0 | -4.609371 | -3.252515 | -0.295663 | 120 | 1 | 0 | 3.558589  | 6.686151  | -2.667807 |
| 76  | 6 | 0 | 2.054358  | 5.046760  | -4.282314 | 121 | 1 | 0 | 2.659515  | 5.564994  | -1.615009 |
| 77  | 6 | 0 | -3.693208 | -3.934179 | 0.593108  | 122 | 1 | 0 | 2.258984  | 7.291588  | -1.621900 |
| 78  | 6 | 0 | -1.401658 | -4.851818 | 0.573826  | 123 | 1 | 0 | 2.413154  | 7.726615  | -4.685089 |
| 79  | 6 | 0 | -1.338714 | -5.297828 | -1.719005 | 124 | 1 | 0 | 1.120584  | 8.345976  | -3.651632 |
| 80  | 6 | 0 | -2.770296 | -4.847687 | 0.082272  | 125 | 1 | 0 | 0.728029  | 7.353317  | -5.073687 |
| 81  | 6 | 0 | -3.614686 | -4.462514 | -2.202750 | 126 | 1 | 0 | -7.323698 | 2.351778  | 5.454132  |
| 82  | 6 | 0 | 2.571550  | 6.449854  | -2.251906 | 127 | 1 | 0 | -6.166919 | 2.742440  | 6.746656  |
| 83  | 6 | 0 | 1.438432  | 7.482783  | -4.248274 | 128 | 1 | 0 | -6.981807 | 1.172904  | 6.725782  |
| 84  | 6 | 0 | -5.391785 | 1.325662  | 5.261150  | 129 | 1 | 0 | -4.793939 | -0.065842 | 6.829359  |
| 85  | 6 | 0 | -6.529956 | 1.942550  | 6.090426  | 130 | 1 | 0 | -3.928981 | 1.483780  | 6.885817  |
| 86  | 6 | 0 | -4.337479 | 0.718959  | 6.214571  | 131 | 1 | 0 | -3.507989 | 0.286328  | 5.649060  |
| 87  | 6 | 0 | -5.967371 | 0.208539  | 4.360407  | 132 | 1 | 0 | -6.441955 | -0.565098 | 4.975829  |
| 88  | 6 | 0 | 6.035562  | 0.988219  | 0.521490  | 133 | 1 | 0 | -5.177357 | -0.257129 | 3.765217  |
| 89  | 7 | 0 | 4.585289  | -0.523762 | -0.753839 | 134 | 1 | 0 | -6.722507 | 0.607406  | 3.672324  |
| 90  | 6 | 0 | 5.780060  | -0.259962 | -0.138517 | 135 | 1 | 0 | 6.581200  | -2.175662 | -0.662922 |
| 91  | 6 | 0 | 6.801579  | -1.235242 | -0.165550 | 136 | 1 | 0 | 7.475708  | 2.162571  | 1.586335  |
| 92  | 6 | 0 | 7.307104  | 1.206961  | 1.097508  | 137 | 1 | 0 | 9.394929  | -2.376767 | 1.393550  |
| 93  | 6 | 0 | 8.298315  | 0.246020  | 1.053784  | 138 | 1 | 0 | 10.012387 | -1.723446 | -0.120012 |
| 94  | 6 | 0 | 8.036395  | -1.008382 | 0.410848  | 139 | 1 | 0 | 8.752221  | -2.968739 | -0.148068 |
| 95  | 6 | 0 | 9.101196  | -2.076440 | 0.379159  | 140 | 1 | 0 | 9.836523  | -0.225620 | 2.499586  |
| 96  | 6 | 0 | 9.638057  | 0.498407  | 1.698441  | 141 | 1 | 0 | 9.686362  | 1.501013  | 2.132549  |
| 97  | 6 | 0 | 3.168914  | -0.133865 | 2.923321  | 142 | 1 | 0 | 10.459178 | 0.403310  | 0.976852  |
| 98  | 6 | 0 | 4.549689  | -0.193040 | 3.167115  | 143 | 1 | 0 | 5.104121  | 0.738190  | 3.242346  |
| 99  | 6 | 0 | 5.220167  | -1.403668 | 3.327657  | 144 | 1 | 0 | 2.565055  | -3.495410 | 2.962209  |
| 100 | 6 | 0 | 4.505327  | -2.622215 | 3.220076  | 145 | 1 | 0 | 1.517963  | 1.041947  | 2.901379  |
| 101 | 6 | 0 | 3.135020  | -2.571618 | 2.991967  | 146 | 1 | 0 | 2.986109  | 1.900605  | 2.992573  |
| 102 | 6 | 0 | 2.440638  | -1.355208 | 2.852121  | 147 | 1 | 0 | 5.693185  | -4.039713 | 4.362832  |
| 103 | 7 | 0 | 2.512097  | 1.059855  | 2.688744  | 148 | 1 | 0 | 4.510475  | -4.782860 | 3.275731  |
| 104 | 7 | 0 | 1.066516  | -1.214795 | 2.788733  | 149 | 1 | 0 | 5.999989  | -4.078981 | 2.629137  |
| 105 | 6 | 0 | 5.210040  | -3.947780 | 3.380979  | 150 | 1 | 0 | 7.106243  | -0.407343 | 3.682199  |
| 106 | 6 | 0 | 6.692179  | -1.418404 | 3.656340  | 151 | 1 | 0 | 6.874424  | -1.888331 | 4.631931  |
| 107 | 1 | 0 | -0.288885 | 3.336711  | 2.851008  | 152 | 1 | 0 | 7.261483  | -1.991227 | 2.914865  |
| 108 | 1 | 0 | 0.656201  | 4.087298  | 0.750895  |     |   |   |           |           |           |
| 109 | 1 | 0 | 3.215973  | -2.878424 | 0.130432  |     |   |   |           |           |           |
| 110 | 1 | 0 | 2.051502  | -1.578848 | 0.180418  |     |   |   |           |           |           |

-----  
The total electronic energy was calculated to be -4241.2453416 Hartree.

## 6.2. Molecular Orbitals of 1 and 3

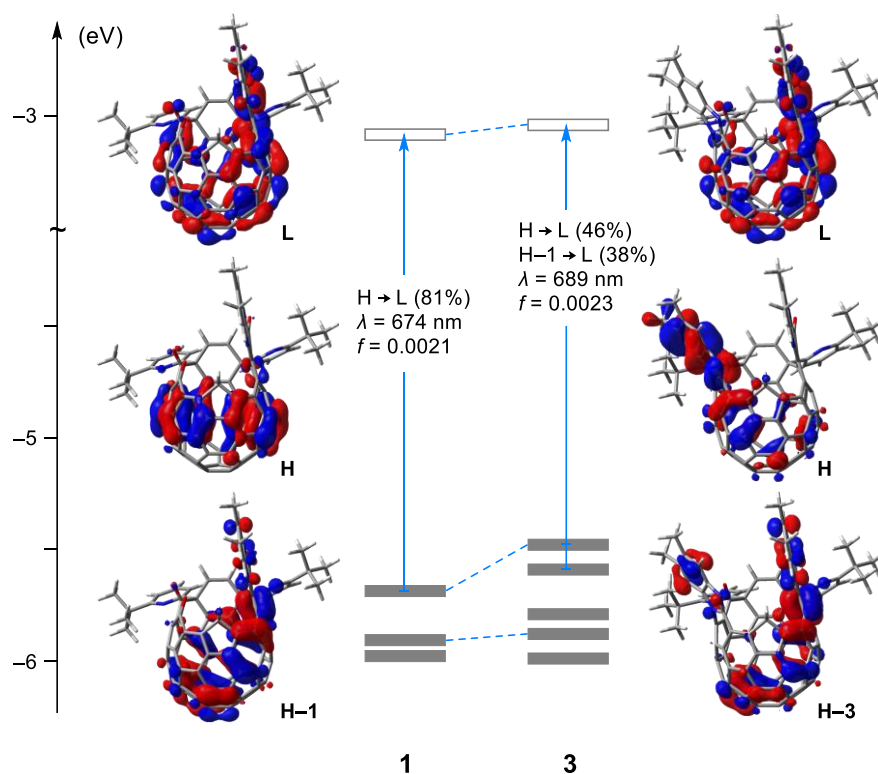

**Figure S15.** Kohn–Sham HOMO and LUMO levels of **1** and **3** with optical transitions (TD CAM-B3LYP/6-31G(d)//B3LYP/6-31G(d)). The transition energies were calibrated with a factor of 0.72.



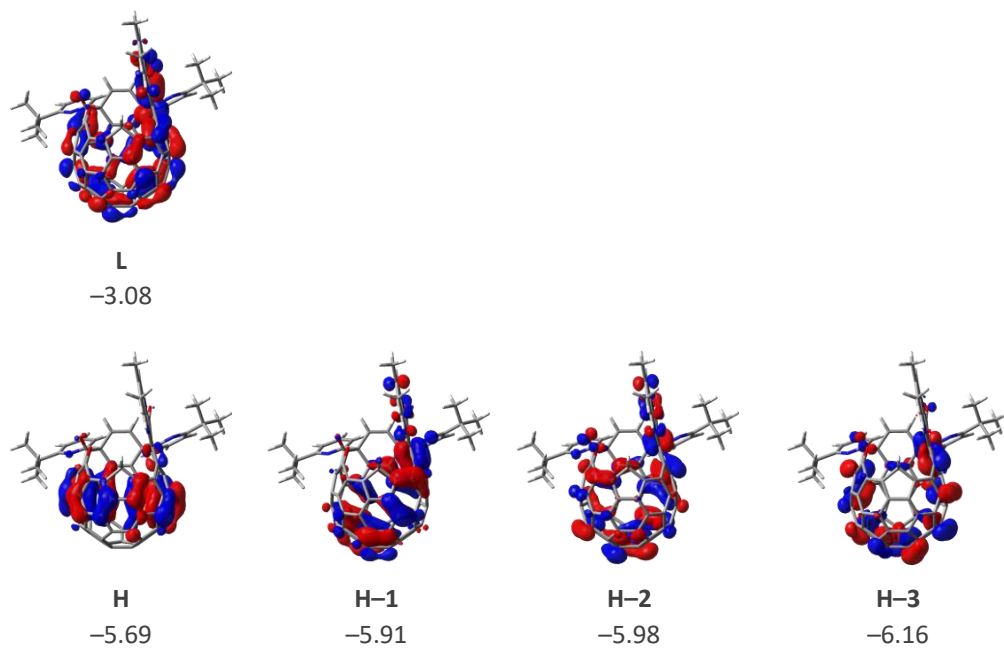

**Figure S16.** Molecular orbitals of **1** (B3LYP/6-31G(d)).

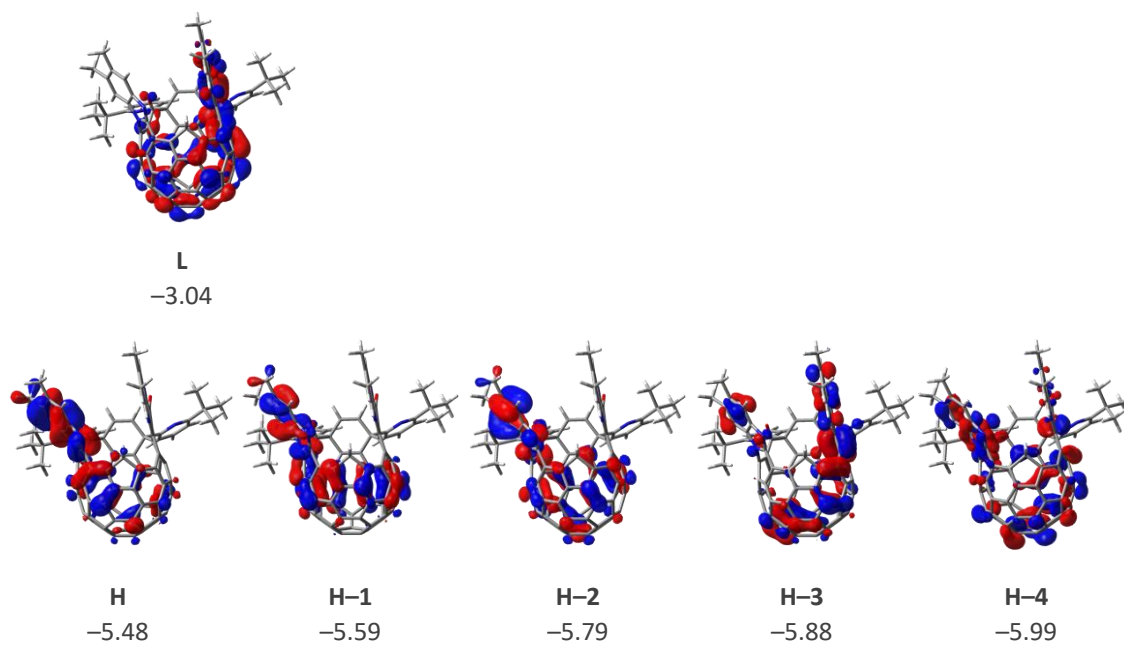

**Figure S17.** Molecular orbitals of **3** (B3LYP/6-31G(d)).

**Table S3.** Optimized structure of **1** (B3LYP/6-31G(d))

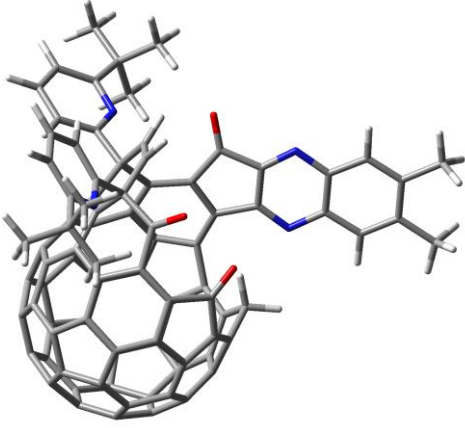

Standard orientation:

| Center Number | Atomic Number | Atomic Type | Coordinates (Angstroms) |           |           |
|---------------|---------------|-------------|-------------------------|-----------|-----------|
|               |               |             | X                       | Y         | Z         |
| 1             | 6             | 0           | -0.116698               | 3.234480  | 1.486122  |
| 2             | 6             | 0           | 0.646435                | 3.346853  | 0.399679  |
| 3             | 6             | 0           | 0.381895                | 2.669674  | -0.929199 |
| 4             | 6             | 0           | 1.383241                | 1.513811  | -1.225209 |
| 5             | 6             | 0           | 2.526871                | 1.183880  | -0.478607 |
| 6             | 6             | 0           | 3.433542                | 2.021187  | 0.396500  |
| 7             | 6             | 0           | 4.371232                | 1.047319  | 1.055224  |
| 8             | 6             | 0           | 4.121593                | -0.257348 | 0.540920  |
| 9             | 6             | 0           | 2.107237                | -3.028323 | 1.239444  |
| 10            | 6             | 0           | 0.800770                | -3.647815 | 1.727515  |
| 11            | 6             | 0           | -0.178649               | -3.075256 | 2.523847  |
| 12            | 6             | 0           | -0.194646               | -1.643012 | 3.030712  |
| 13            | 6             | 0           | -1.646034               | -1.178378 | 2.811533  |
| 14            | 6             | 0           | -2.063634               | 0.064480  | 2.327922  |
| 15            | 6             | 0           | -1.310559               | 1.327711  | 2.606158  |
| 16            | 6             | 0           | -1.416950               | 2.478405  | 1.544788  |
| 17            | 7             | 0           | -3.446213               | 2.934403  | 2.861446  |
| 18            | 8             | 0           | 3.520479                | 3.231137  | 0.484223  |
| 19            | 8             | 0           | -0.659343               | 1.479098  | 3.617509  |
| 20            | 7             | 0           | 1.696086                | 3.909340  | -2.574553 |
| 21            | 6             | 0           | -1.788819               | 1.892010  | 0.198735  |
| 22            | 6             | 0           | -1.374954               | 1.283638  | -2.128916 |
| 23            | 7             | 0           | 5.302937                | 1.327721  | 1.930381  |
| 24            | 6             | 0           | -2.938589               | 1.009903  | 0.200947  |
| 25            | 6             | 0           | 0.994248                | 0.593232  | -2.248662 |
| 26            | 8             | 0           | 0.777766                | -0.994262 | 3.349263  |
| 27            | 6             | 0           | -0.690062               | -0.404369 | -3.777755 |
| 28            | 6             | 0           | 1.904355                | 4.879696  | -3.483772 |
| 29            | 6             | 0           | 0.146647                | -1.579609 | -3.959601 |
| 30            | 6             | 0           | 0.491836                | 3.757448  | -2.024033 |
| 31            | 6             | 0           | -0.325418               | 0.629012  | -2.892651 |
| 32            | 6             | 0           | -2.683929               | 0.796680  | -2.229646 |
| 33            | 6             | 0           | -1.005474               | 2.009515  | -0.932425 |
| 34            | 6             | 0           | 1.301970                | -1.688447 | -3.212760 |
| 35            | 6             | 0           | -3.043641               | -0.266841 | -3.131722 |
| 36            | 6             | 0           | 2.547440                | -1.115885 | -1.328903 |
| 37            | 6             | 0           | -2.057125               | -0.855054 | -3.911950 |
| 38            | 6             | 0           | -3.479757               | 0.646304  | -1.031578 |
| 39            | 6             | 0           | -3.129685               | 0.109050  | 1.339700  |
| 40            | 6             | 0           | 1.714491                | -0.613109 | -2.370400 |
| 41            | 6             | 0           | -2.620568               | 4.741148  | 1.516027  |
| 42            | 6             | 0           | -2.548151               | 3.435441  | 2.004476  |
| 43            | 6             | 0           | 0.900156                | -4.044187 | -2.772560 |
| 44            | 6             | 0           | -3.934177               | -1.030707 | 1.151084  |
| 45            | 6             | 0           | -4.318132               | -0.517121 | -1.202944 |
| 46            | 6             | 0           | -3.675244               | 5.542781  | 1.949875  |
| 47            | 6             | 0           | 3.047693                | -0.164324 | -0.457156 |
| 48            | 6             | 0           | -2.064267               | -2.296166 | -4.118351 |
| 49            | 6             | 0           | 0.866514                | 5.734520  | -3.873766 |
| 50            | 6             | 0           | 0.643940                | -4.889921 | -1.639160 |
| 51            | 6             | 0           | -3.041231               | -3.089002 | -3.509309 |
| 52            | 6             | 0           | 2.378769                | -2.600900 | -1.338365 |
| 53            | 6             | 0           | -4.603722               | 5.022857  | 2.845161  |
| 54            | 6             | 0           | 3.339151                | 4.971305  | -4.021653 |
| 55            | 6             | 0           | -0.593954               | 4.579665  | -2.348692 |
| 56            | 6             | 0           | 2.102640                | -3.410694 | -0.242872 |
| 57            | 6             | 0           | -4.460845               | 3.698989  | 3.291037  |
| 58            | 6             | 0           | -4.065199               | -1.084517 | -2.509366 |
| 59            | 6             | 0           | -0.731336               | -5.349524 | -1.719114 |
| 60            | 6             | 0           | -0.894061               | -5.167189 | 0.724599  |
| 61            | 6             | 0           | 1.709405                | -2.923306 | -2.595830 |
| 62            | 6             | 0           | -3.585235               | -2.281767 | 1.771984  |
| 63            | 6             | 0           | -0.688095               | -2.742393 | -4.153711 |
| 64            | 6             | 0           | -2.664344               | -4.345805 | -2.885293 |
| 65            | 6             | 0           | 1.205240                | -4.536282 | -0.407609 |
| 66            | 6             | 0           | -0.393463               | 5.578374  | -3.295096 |
| 67            | 6             | 0           | -2.403632               | -2.347133 | 2.500039  |
| 68            | 6             | 0           | 0.416556                | -4.682861 | 0.799106  |
| 69            | 6             | 0           | -1.330574               | -4.768424 | -2.907515 |
| 70            | 6             | 0           | -0.319910               | -3.952989 | -3.556522 |
| 71            | 6             | 0           | -1.539727               | -3.505735 | 2.373882  |
| 72            | 6             | 0           | -4.064177               | -2.469094 | -2.685071 |
| 73            | 6             | 0           | -4.320073               | -3.340490 | -1.551406 |
| 74            | 6             | 0           | -4.558139               | -1.344207 | -0.115785 |
| 75            | 6             | 0           | -2.876128               | -5.062710 | -0.531350 |
| 76            | 6             | 0           | -4.566781               | -2.785898 | -0.289706 |
| 77            | 6             | 0           | 3.731377                | 3.602368  | -4.622479 |
| 78            | 6             | 0           | -3.966283               | -3.369583 | 0.889133  |
| 79            | 6             | 0           | -1.908246               | -4.559042 | 1.545136  |
| 80            | 6             | 0           | -1.487152               | -5.492358 | -0.556943 |
| 81            | 6             | 0           | -3.137235               | -4.486535 | 0.772336  |
| 82            | 6             | 0           | -3.455498               | -4.498857 | -1.674276 |
| 83            | 6             | 0           | 4.277042                | 5.297916  | -2.835638 |
| 84            | 6             | 0           | 3.493286                | 6.056198  | -5.101679 |
| 85            | 6             | 0           | -5.455932               | 3.082492  | 4.285629  |
| 86            | 6             | 0           | -6.870609               | 3.085125  | 3.659201  |
| 87            | 6             | 0           | -5.468202               | 3.924435  | 5.583581  |
| 88            | 6             | 0           | -5.067642               | 1.635572  | 4.636018  |
| 89            | 6             | 0           | 6.030995                | 0.243511  | 2.342443  |
| 90            | 7             | 0           | 4.810964                | -1.319824 | 0.895555  |
| 91            | 6             | 0           | 5.787769                | -1.073111 | 1.825023  |
| 92            | 6             | 0           | 6.589914                | -2.140333 | 2.288773  |
| 93            | 6             | 0           | 7.056956                | 0.424282  | 3.298439  |
| 94            | 6             | 0           | 7.829382                | -0.630472 | 3.743631  |
| 95            | 6             | 0           | 7.589411                | -1.946550 | 3.223662  |
| 96            | 6             | 0           | 8.423426                | -3.112631 | 3.694039  |
| 97            | 6             | 0           | 8.915138                | -0.400061 | 4.765947  |

|     |   |   |           |           |           |     |   |   |           |           |          |
|-----|---|---|-----------|-----------|-----------|-----|---|---|-----------|-----------|----------|
| 98  | 1 | 0 | 0.177115  | 3.731950  | 2.405426  | 117 | 1 | 0 | -6.893222 | 2.495308  | 2.735699 |
| 99  | 1 | 0 | 1.549966  | 3.940072  | 0.437278  | 118 | 1 | 0 | -7.213283 | 4.098126  | 3.420176 |
| 100 | 1 | 0 | 2.984559  | -3.435374 | 1.759365  | 119 | 1 | 0 | -7.592647 | 2.646391  | 4.358143 |
| 101 | 1 | 0 | 2.129186  | -1.950879 | 1.406985  | 120 | 1 | 0 | -6.170541 | 3.491396  | 6.305670 |
| 102 | 1 | 0 | -1.870454 | 5.116994  | 0.828563  | 121 | 1 | 0 | -5.777310 | 4.959599  | 5.400647 |
| 103 | 1 | 0 | -3.767813 | 6.565945  | 1.594734  | 122 | 1 | 0 | -4.475813 | 3.945250  | 6.047583 |
| 104 | 1 | 0 | 1.030578  | 6.510029  | -4.612253 | 123 | 1 | 0 | -5.786518 | 1.229263  | 5.357363 |
| 105 | 1 | 0 | -5.426532 | 5.637455  | 3.195631  | 124 | 1 | 0 | -4.067708 | 1.584330  | 5.076356 |
| 106 | 1 | 0 | -1.561597 | 4.434151  | -1.879845 | 125 | 1 | 0 | -5.068800 | 0.994358  | 3.749937 |
| 107 | 1 | 0 | -1.211923 | 6.233372  | -3.583019 | 126 | 1 | 0 | 6.394190  | -3.128138 | 1.880883 |
| 108 | 1 | 0 | 4.773344  | 3.623978  | -4.963529 | 127 | 1 | 0 | 7.215961  | 1.431580  | 3.672533 |
| 109 | 1 | 0 | 3.098757  | 3.351912  | -5.482895 | 128 | 1 | 0 | 8.332627  | -3.262054 | 4.777523 |
| 110 | 1 | 0 | 3.623464  | 2.809398  | -3.878134 | 129 | 1 | 0 | 9.489608  | -2.955584 | 3.486402 |
| 111 | 1 | 0 | 5.322258  | 5.297638  | -3.168144 | 130 | 1 | 0 | 8.118165  | -4.039410 | 3.200473 |
| 112 | 1 | 0 | 4.162632  | 4.564084  | -2.033257 | 131 | 1 | 0 | 8.745171  | -0.989297 | 5.676201 |
| 113 | 1 | 0 | 4.055343  | 6.288963  | -2.421409 | 132 | 1 | 0 | 8.964812  | 0.653648  | 5.053738 |
| 114 | 1 | 0 | 4.529836  | 6.077190  | -5.456064 | 133 | 1 | 0 | 9.901325  | -0.690540 | 4.381638 |
| 115 | 1 | 0 | 3.259965  | 7.055632  | -4.715862 |     |   |   |           |           |          |
| 116 | 1 | 0 | 2.851830  | 5.864318  | -5.970299 |     |   |   |           |           |          |

The total electronic energy was calculated to be -3895.8110862 Hartree.

**Table S4.** Optimized structure of **3** (B3LYP/6-31G(d))

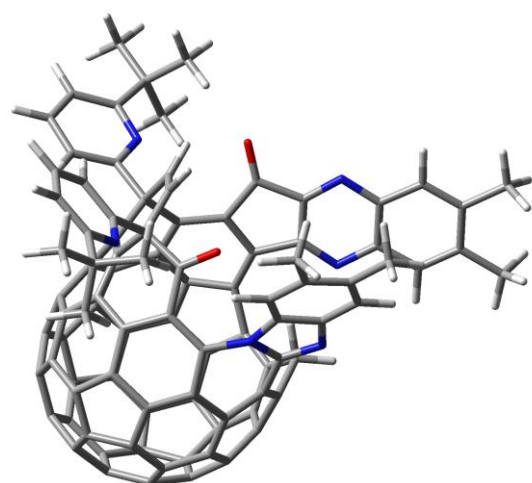

Standard orientation:

| Center Number | Atomic Number | Atomic Type | Coordinates (Angstroms) |           |           |
|---------------|---------------|-------------|-------------------------|-----------|-----------|
|               |               |             | X                       | Y         | Z         |
| 1             | 6             | 0           | 0.274942                | 1.388035  | 3.115837  |
| 2             | 6             | 0           | -0.319794               | 0.233521  | 3.414853  |
| 3             | 6             | 0           | 0.097779                | -1.127591 | 2.896646  |
| 4             | 6             | 0           | -0.897285               | -1.735319 | 1.861639  |
| 5             | 6             | 0           | -2.159875               | -1.234656 | 1.502156  |
| 6             | 6             | 0           | -3.147637               | -0.373121 | 2.257409  |
| 7             | 6             | 0           | -4.242678               | -0.057111 | 1.275564  |
| 8             | 6             | 0           | -3.988534               | -0.751150 | 0.057913  |
| 9             | 6             | 0           | -2.393493               | -0.266080 | -3.062681 |
| 10            | 6             | 0           | -1.210477               | 0.317313  | -3.839945 |
| 11            | 6             | 0           | -0.413287               | 1.401782  | -3.485437 |
| 12            | 6             | 0           | -0.828960               | 2.500456  | -2.630047 |
| 13            | 6             | 0           | 1.362855                | 2.451021  | -1.553355 |
| 14            | 6             | 0           | 1.893421                | 2.124279  | -0.287163 |
| 15            | 6             | 0           | 1.134137                | 2.374168  | 0.976180  |
| 16            | 6             | 0           | 1.497639                | 1.523208  | 2.243687  |
| 17            | 7             | 0           | 3.205297                | 3.291910  | 2.426172  |
| 18            | 8             | 0           | -3.173724               | -0.079078 | 3.437330  |
| 19            | 8             | 0           | 0.199264                | 3.146781  | 1.056633  |
| 20            | 7             | 0           | -0.936202               | -2.668497 | 4.481022  |
| 21            | 6             | 0           | 2.024071                | 0.175871  | 1.814289  |

|    |   |   |           |           |           |
|----|---|---|-----------|-----------|-----------|
| 22 | 6 | 0 | 1.953417  | -2.248641 | 1.578981  |
| 23 | 7 | 0 | -5.296314 | 0.688908  | 1.491462  |
| 24 | 6 | 0 | 3.093930  | 0.221448  | 0.844616  |
| 25 | 6 | 0 | -0.395418 | -2.827645 | 1.084540  |
| 26 | 6 | 0 | 1.462775  | -4.232031 | 0.218713  |
| 27 | 6 | 0 | -0.975829 | -3.435628 | 5.585503  |
| 28 | 6 | 0 | 0.608888  | -4.733954 | -0.844230 |
| 29 | 6 | 0 | 0.196264  | -2.058845 | 4.129928  |
| 30 | 6 | 0 | 1.009279  | -3.255768 | 1.126138  |
| 31 | 6 | 0 | 3.234559  | -2.222389 | 1.013619  |
| 32 | 6 | 0 | 1.435546  | -1.027157 | 2.150958  |
| 33 | 6 | 0 | -0.656559 | -4.199646 | -0.981077 |
| 34 | 6 | 0 | 3.682799  | -3.217247 | 0.074102  |
| 35 | 6 | 0 | -2.168981 | -2.462133 | -0.626003 |
| 36 | 6 | 0 | 2.809501  | -4.226772 | -0.309091 |
| 37 | 6 | 0 | 3.808050  | -0.954753 | 0.621402  |
| 38 | 6 | 0 | 3.035379  | 1.229680  | -0.215519 |
| 39 | 6 | 0 | -1.145684 | -3.256648 | -0.029614 |
| 40 | 6 | 0 | 2.938096  | 1.856313  | 4.329023  |
| 41 | 6 | 0 | 2.601905  | 2.269587  | 3.033631  |
| 42 | 6 | 0 | -0.464174 | -4.132956 | -3.399414 |
| 43 | 6 | 0 | 3.764228  | 0.973000  | -1.386924 |
| 44 | 6 | 0 | 4.596315  | -1.175643 | -0.565570 |
| 45 | 6 | 0 | 3.946479  | 2.545256  | 4.990787  |
| 46 | 6 | 0 | -2.752129 | -1.528674 | 0.214488  |
| 47 | 6 | 0 | 2.775984  | -4.667768 | -1.696044 |
| 48 | 6 | 0 | 0.165497  | -3.617216 | 6.376371  |
| 49 | 6 | 0 | -0.455872 | -3.146223 | -4.441462 |
| 50 | 6 | 0 | 3.590876  | -4.047082 | -2.648283 |
| 51 | 6 | 0 | -2.094823 | -2.715675 | -2.100997 |
| 52 | 6 | 0 | 4.579823  | 3.614263  | 4.354528  |
| 53 | 6 | 0 | -2.343273 | -4.059564 | 5.897740  |
| 54 | 6 | 0 | 1.376429  | -2.179067 | 4.873205  |
| 55 | 6 | 0 | -2.087778 | -1.770442 | -3.123810 |
| 56 | 6 | 0 | 4.182006  | 3.970144  | 3.061793  |
| 57 | 6 | 0 | 4.538712  | -2.581263 | -0.907854 |
| 58 | 6 | 0 | 0.891936  | -3.067762 | -4.982486 |
| 59 | 6 | 0 | 0.626607  | -0.632735 | -5.176407 |
| 60 | 6 | 0 | -1.230804 | -3.882993 | -2.261069 |
| 61 | 6 | 0 | 3.188591  | 1.285617  | -2.668582 |
| 62 | 6 | 0 | 1.404207  | -4.992531 | -2.022131 |
| 63 | 6 | 0 | 3.047453  | -3.711107 | -3.953062 |
| 64 | 6 | 0 | -1.220392 | -1.991947 | -4.262916 |
| 65 | 6 | 0 | 1.350651  | -2.978984 | 6.010773  |

|     |   |   |           |           |           |     |   |   |            |           |           |
|-----|---|---|-----------|-----------|-----------|-----|---|---|------------|-----------|-----------|
| 66  | 6 | 0 | 1.913283  | 1.852261  | -2.752713 | 110 | 1 | 0 | 2.414028   | 1.029576  | 4.796548  |
| 67  | 6 | 0 | -0.665417 | -0.713867 | -4.655981 | 111 | 1 | 0 | 4.239087   | 2.257522  | 5.997358  |
| 68  | 6 | 0 | 1.717915  | -4.022390 | -4.264258 | 112 | 1 | 0 | 0.137138   | -4.241746 | 7.261017  |
| 69  | 6 | 0 | 0.877075  | -4.679441 | -3.279495 | 113 | 1 | 0 | 5.365658   | 4.158107  | 4.864736  |
| 70  | 6 | 0 | 1.005225  | 1.371545  | -3.795281 | 114 | 1 | 0 | 2.284103   | -1.671420 | 4.564431  |
| 71  | 6 | 0 | 4.489913  | -2.978752 | -2.244829 | 115 | 1 | 0 | 2.247796   | -3.106604 | 6.611346  |
| 72  | 6 | 0 | 4.491674  | -1.973374 | -3.293373 | 116 | 1 | 0 | -3.801045  | -5.299252 | 4.849988  |
| 73  | 6 | 0 | 4.580043  | -0.211214 | -1.560861 | 117 | 1 | 0 | -2.116888  | -5.729279 | 4.493327  |
| 74  | 6 | 0 | 2.796714  | -1.504681 | -5.024890 | 118 | 1 | 0 | -2.824932  | -4.269548 | 3.776945  |
| 75  | 6 | 0 | 4.529389  | -0.617156 | -2.950322 | 119 | 1 | 0 | -4.356923  | -3.321221 | 6.304148  |
| 76  | 6 | 0 | -2.798734 | -4.889820 | 4.676342  | 120 | 1 | 0 | -3.383355  | -2.229929 | 5.288594  |
| 77  | 6 | 0 | 3.672043  | 0.323100  | -3.632751 | 121 | 1 | 0 | -3.077901  | -2.330491 | 7.030727  |
| 78  | 6 | 0 | 1.482416  | 0.423299  | -4.714580 | 122 | 1 | 0 | -3.298182  | -5.394846 | 7.313389  |
| 79  | 6 | 0 | 1.422012  | -1.832462 | -5.349227 | 123 | 1 | 0 | -2.017223  | -4.421876 | 8.041910  |
| 80  | 6 | 0 | 2.826271  | -0.106810 | -4.643466 | 124 | 1 | 0 | -1.606810  | -5.807928 | 7.007749  |
| 81  | 6 | 0 | 3.601852  | -2.425687 | -4.347679 | 125 | 1 | 0 | 6.743107   | 5.182683  | 3.287242  |
| 82  | 6 | 0 | -3.352073 | -2.912397 | 6.142241  | 126 | 1 | 0 | 5.538989   | 6.284783  | 3.991127  |
| 83  | 6 | 0 | -2.303435 | -4.970809 | 7.136952  | 127 | 1 | 0 | 6.307904   | 6.676590  | 2.449750  |
| 84  | 6 | 0 | 4.794615  | 5.135484  | 2.271581  | 128 | 1 | 0 | 4.062512   | 6.962252  | 1.326482  |
| 85  | 6 | 0 | 5.908465  | 5.854003  | 3.053131  | 129 | 1 | 0 | 3.264794   | 6.590819  | 2.867901  |
| 86  | 6 | 0 | 3.672368  | 6.149284  | 1.950544  | 130 | 1 | 0 | 2.852561   | 5.658629  | 1.418533  |
| 87  | 6 | 0 | 5.381649  | 4.585065  | 0.951946  | 131 | 1 | 0 | 5.782643   | 5.405610  | 0.344954  |
| 88  | 6 | 0 | -6.155056 | 0.770065  | 0.427650  | 132 | 1 | 0 | 4.615356   | 4.064510  | 0.371890  |
| 89  | 7 | 0 | -4.798344 | -0.715851 | -0.977986 | 133 | 1 | 0 | 6.197858   | 3.879553  | 1.148375  |
| 90  | 6 | 0 | -5.908374 | 0.067675  | -0.799771 | 134 | 1 | 0 | -6.644992  | -0.354582 | -2.767518 |
| 91  | 6 | 0 | -6.848220 | 0.187749  | -1.848366 | 135 | 1 | 0 | -7.483089  | 2.077998  | 1.481852  |
| 92  | 6 | 0 | -7.323726 | 1.558003  | 0.541519  | 136 | 1 | 0 | -9.085486  | 2.102984  | -3.199205 |
| 93  | 6 | 0 | -8.230628 | 1.666583  | -0.494406 | 137 | 1 | 0 | -9.961795  | 0.708975  | -2.575240 |
| 94  | 6 | 0 | -7.985917 | 0.961858  | -1.720606 | 138 | 1 | 0 | -8.631890  | 0.472335  | -3.721039 |
| 95  | 6 | 0 | -8.964571 | 1.064839  | -2.864371 | 139 | 1 | 0 | -9.503578  | 3.318331  | -1.087792 |
| 96  | 6 | 0 | -9.467182 | 2.517270  | -0.338369 | 140 | 1 | 0 | -9.500970  | 2.981939  | 0.650860  |
| 97  | 6 | 0 | -1.756647 | 4.278717  | -1.887687 | 141 | 1 | 0 | -10.383457 | 1.926218  | -0.464197 |
| 98  | 6 | 0 | -2.612976 | 5.363875  | -1.660923 | 142 | 1 | 0 | -3.614478  | 5.353188  | -2.081438 |
| 99  | 6 | 0 | -2.159600 | 6.450497  | -0.921037 | 143 | 1 | 0 | 1.029394   | 5.383269  | -0.211788 |
| 100 | 6 | 0 | -0.827915 | 6.459297  | -0.404985 | 144 | 1 | 0 | -3.365803  | -0.040124 | -3.518625 |
| 101 | 6 | 0 | 0.022923  | 5.376068  | -0.614966 | 145 | 1 | 0 | -0.931798  | 7.819781  | 1.283210  |
| 102 | 6 | 0 | -0.457085 | 4.286811  | -1.339780 | 146 | 1 | 0 | 0.707606   | 7.505859  | 0.698270  |
| 103 | 7 | 0 | -1.964915 | 3.153811  | -2.670300 | 147 | 1 | 0 | -0.375037  | 8.575775  | -0.206769 |
| 104 | 7 | 0 | 0.128426  | 3.099081  | -1.784858 | 148 | 1 | 0 | -4.054588  | 7.462106  | -1.136894 |
| 105 | 6 | 0 | -0.329564 | 7.649542  | 0.381159  | 149 | 1 | 0 | -3.239362  | 7.799934  | 0.396774  |
| 106 | 6 | 0 | -3.076388 | 7.626690  | -0.675112 | 150 | 1 | 0 | -2.667142  | 8.559245  | -1.085666 |
| 107 | 1 | 0 | -0.114362 | 2.313421  | 3.528004  |     |   |   |            |           |           |
| 108 | 1 | 0 | -1.180603 | 0.228972  | 4.069408  |     |   |   |            |           |           |
| 109 | 1 | 0 | -2.436560 | 0.120455  | -2.043873 |     |   |   |            |           |           |

-----  
The total electronic energy was calculated to be -4239.8124923 Hartree.

### 6.3. Orbital Energy Levels of 1–6

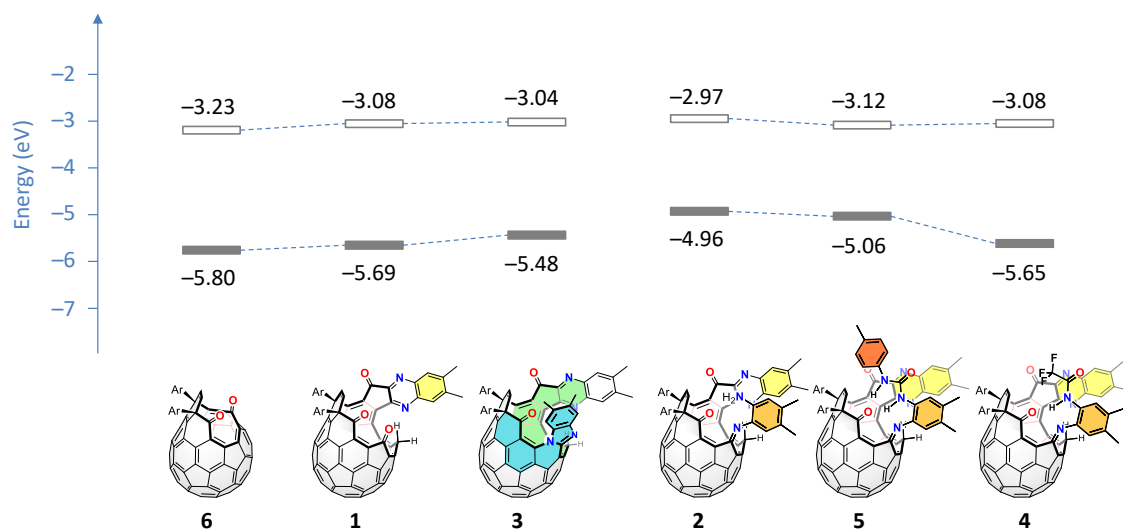

**Figure S18.** Orbital energy levels of 1–6 (B3LYP/6-31G(d)).

**Table S5.** Optimized structure of **6** (B3LYP/6-31G(d))

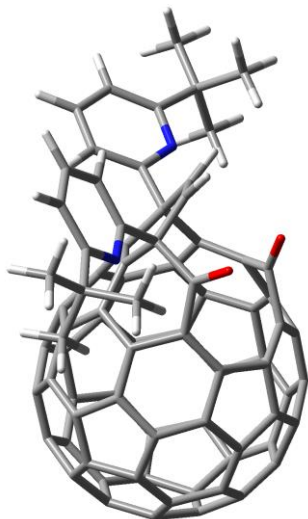

Standard orientation:

| Center Number | Atomic Number | Atomic Type | Coordinates (Angstroms) |           |           |
|---------------|---------------|-------------|-------------------------|-----------|-----------|
|               |               |             | X                       | Y         | Z         |
| 1             | 6             | 0           | -3.612146               | 0.691073  | 1.357564  |
| 2             | 6             | 0           | -3.058414               | 1.881440  | 1.142633  |
| 3             | 6             | 0           | -1.967315               | 2.144450  | 0.131789  |
| 4             | 6             | 0           | -0.572352               | 2.349622  | 0.762941  |
| 5             | 6             | 0           | -0.192273               | 1.951591  | 2.037491  |
| 6             | 6             | 0           | -0.767972               | 0.897452  | 2.999073  |
| 7             | 6             | 0           | 0.429751                | -0.031757 | 3.245382  |
| 8             | 6             | 0           | 0.653408                | -1.393655 | 3.044970  |
| 9             | 6             | 0           | -0.064629               | -2.366076 | 2.112693  |
| 10            | 6             | 0           | -1.194585               | -2.165762 | 1.305074  |
| 11            | 6             | 0           | -2.450023               | -1.480133 | 1.734306  |
| 12            | 6             | 0           | -3.173107               | -0.574873 | 0.668448  |
| 13            | 6             | 0           | -2.207101               | -0.304227 | -0.466658 |
| 14            | 6             | 0           | -1.729426               | 0.950838  | -0.784440 |
| 15            | 6             | 0           | -0.687362               | 1.109764  | -1.773121 |
| 16            | 6             | 0           | 0.378630                | 2.093095  | -1.554356 |
| 17            | 6             | 0           | 0.490788                | 2.656439  | -0.197085 |
| 18            | 6             | 0           | 1.777458                | 2.958263  | 0.284263  |
| 19            | 6             | 0           | 2.136053                | 2.653041  | 1.650450  |
| 20            | 6             | 0           | 1.185228                | 2.024727  | 2.432702  |
| 21            | 6             | 0           | 1.552672                | 0.876835  | 3.241682  |
| 22            | 6             | 0           | 2.873865                | 0.459096  | 3.273755  |
| 23            | 6             | 0           | 3.132026                | -0.952812 | 3.222252  |
| 24            | 6             | 0           | 2.051840                | -1.833855 | 3.082578  |
| 25            | 6             | 0           | 2.221237                | -2.992663 | 2.244439  |
| 26            | 6             | 0           | 0.946689                | -3.276229 | 1.635670  |
| 27            | 6             | 0           | 0.901429                | -3.832052 | 0.356061  |
| 28            | 6             | 0           | -0.118102               | -3.390635 | -0.553084 |
| 29            | 6             | 0           | -1.115169               | -2.510913 | -0.109757 |
| 30            | 6             | 0           | -1.572271               | -1.468458 | -1.034894 |
| 31            | 6             | 0           | -0.877603               | -1.300814 | -2.232424 |
| 32            | 6             | 0           | -0.451306               | 0.025517  | -2.629006 |
| 33            | 6             | 0           | 0.771397                | -0.108944 | -3.376271 |
| 34            | 6             | 0           | 1.751259                | 0.863392  | -3.248926 |
| 35            | 6             | 0           | 1.550276                | 1.974447  | -2.333845 |
| 36            | 6             | 0           | 2.857294                | 2.320300  | -1.808553 |
| 37            | 6             | 0           | 2.968904                | 2.793285  | -0.510828 |
| 38            | 6             | 0           | 4.051318                | 2.336091  | 0.346383  |
| 39            | 6             | 0           | 3.520631                | 2.224388  | 1.687688  |
| 40            | 6             | 0           | 3.889943                | 1.148169  | 2.496805  |
| 41            | 6             | 0           | 4.810768                | 0.147801  | 1.996397  |
| 42            | 6             | 0           | 4.354525                | -1.153938 | 2.463772  |
| 43            | 6             | 0           | 4.492146                | -2.271994 | 1.643652  |
| 44            | 6             | 0           | 3.410166                | -3.234113 | 1.558591  |
| 45            | 6             | 0           | 3.359987                | -3.741802 | 0.197699  |
| 46            | 6             | 0           | 2.131355                | -4.046775 | -0.385891 |
| 47            | 6             | 0           | 1.875887                | -3.688561 | -1.768959 |
| 48            | 6             | 0           | 0.484382                | -3.292390 | -1.868407 |
| 49            | 6             | 0           | 0.120756                | -2.237439 | -2.693337 |
| 50            | 6             | 0           | 1.132511                | -1.512652 | -3.433620 |
| 51            | 6             | 0           | 2.470385                | -1.893570 | -3.355256 |
| 52            | 6             | 0           | 3.502500                | -0.876656 | -3.255086 |
| 53            | 6             | 0           | 3.148769                | 0.475732  | -3.218629 |
| 54            | 6             | 0           | 3.837810                | 1.384293  | -2.324435 |
| 55            | 6             | 0           | 4.860622                | 0.914880  | -1.495605 |
| 56            | 6             | 0           | 5.202375                | -0.496851 | -1.504541 |
| 57            | 6             | 0           | 4.536335                | -1.373317 | -2.363158 |
| 58            | 6             | 0           | 4.127585                | -2.687040 | -1.892287 |
| 59            | 6             | 0           | 2.852716                | -3.011114 | -2.505668 |
| 60            | 6             | 0           | 4.383083                | -3.059243 | -0.568871 |
| 61            | 6             | 0           | 5.081480                | -2.147230 | 0.324639  |
| 62            | 6             | 0           | 5.492857                | -0.893706 | -0.136472 |
| 63            | 6             | 0           | 5.354504                | 0.274953  | 0.713705  |
| 64            | 6             | 0           | 4.964866                | 1.394737  | -0.129184 |
| 65            | 6             | 0           | -4.399879               | -1.341005 | 0.120640  |
| 66            | 6             | 0           | -5.470071               | -0.644613 | -0.451805 |
| 67            | 6             | 0           | -6.538331               | -1.385771 | -0.944597 |
| 68            | 6             | 0           | -6.510483               | -2.776948 | -0.849050 |
| 69            | 6             | 0           | -5.399555               | -3.399094 | -0.266181 |
| 70            | 6             | 0           | -2.389668               | 3.420766  | -0.628466 |
| 71            | 6             | 0           | -3.143838               | 3.361074  | -1.804778 |
| 72            | 6             | 0           | -3.551612               | 4.561424  | -2.377317 |
| 73            | 6             | 0           | -3.204663               | 5.766929  | -1.767619 |
| 74            | 6             | 0           | -2.456695               | 5.740843  | -0.583672 |
| 75            | 7             | 0           | -2.069597               | 4.573645  | -0.037344 |
| 76            | 8             | 0           | -1.816225               | 0.864584  | 3.591145  |
| 77            | 8             | 0           | -2.920978               | -1.651716 | 2.838261  |
| 78            | 7             | 0           | -4.366168               | -2.671581 | 0.198049  |
| 79            | 6             | 0           | -5.263679               | -4.919164 | -0.098754 |
| 80            | 6             | 0           | -2.011416               | 6.999834  | 0.174290  |
| 81            | 6             | 0           | -5.079178               | -5.230098 | 1.404654  |
| 82            | 6             | 0           | -4.015074               | -5.392761 | -0.877330 |
| 83            | 6             | 0           | -6.496622               | -5.677293 | -0.621455 |
| 84            | 6             | 0           | -2.547996               | 6.922042  | 1.621814  |
| 85            | 6             | 0           | -2.524856               | 8.292988  | -0.482725 |
| 86            | 6             | 0           | -0.465607               | 7.027881  | 0.204339  |
| 87            | 1             | 0           | -4.364915               | 0.568882  | 2.129692  |
| 88            | 1             | 0           | -3.368151               | 2.743083  | 1.727043  |
| 89            | 1             | 0           | -5.461053               | 0.439297  | -0.499612 |
| 90            | 1             | 0           | -7.391174               | -0.885652 | -1.396489 |
| 91            | 1             | 0           | -7.342985               | -3.361401 | -1.221860 |
| 92            | 1             | 0           | -3.396628               | 2.407246  | -2.255463 |
| 93            | 1             | 0           | -4.135335               | 4.561097  | -3.294300 |
| 94            | 1             | 0           | -3.515806               | 6.705670  | -2.209879 |
| 95            | 1             | 0           | -4.917559               | -6.304780 | 1.551269  |

|     |   |   |           |           |           |     |   |   |           |          |           |
|-----|---|---|-----------|-----------|-----------|-----|---|---|-----------|----------|-----------|
| 96  | 1 | 0 | -5.967338 | -4.939683 | 1.978407  | 106 | 1 | 0 | -3.644632 | 6.927754 | 1.637644  |
| 97  | 1 | 0 | -4.222325 | -4.687155 | 1.811701  | 107 | 1 | 0 | -2.187764 | 9.158925 | 0.097764  |
| 98  | 1 | 0 | -3.870616 | -6.471006 | -0.739509 | 108 | 1 | 0 | -3.620225 | 8.327372 | -0.518018 |
| 99  | 1 | 0 | -3.117954 | -4.875535 | -0.527194 | 109 | 1 | 0 | -2.143526 | 8.414971 | -1.503428 |
| 100 | 1 | 0 | -4.122709 | -5.200766 | -1.951858 | 110 | 1 | 0 | -0.113406 | 7.887511 | 0.787047  |
| 101 | 1 | 0 | -6.355494 | -6.753763 | -0.474483 | 111 | 1 | 0 | -0.052883 | 7.113421 | -0.808126 |
| 102 | 1 | 0 | -6.657592 | -5.511162 | -1.693350 | 112 | 1 | 0 | -0.070945 | 6.114063 | 0.656623  |
| 103 | 1 | 0 | -7.410185 | -5.390019 | -0.087672 |     |   |   |           |          |           |
| 104 | 1 | 0 | -2.197129 | 7.783598  | 2.202259  |     |   |   |           |          |           |
| 105 | 1 | 0 | -2.204215 | 6.007667  | 2.112304  |     |   |   |           |          |           |

The total electronic energy was calculated to be -3400.1159847 Hartree.

**Table S6.** Optimized structure of **4** (B3LYP/6-31G(d))

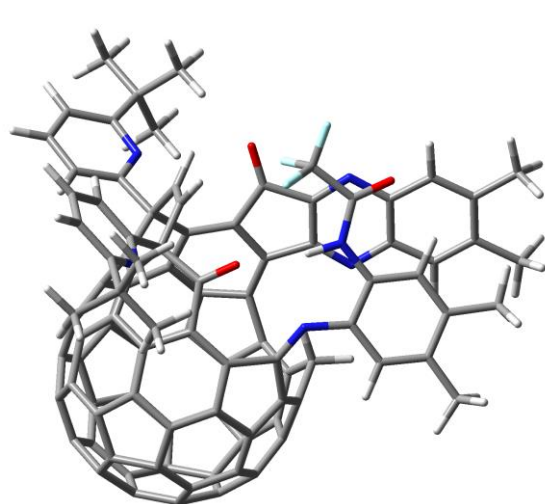

Standard orientation:

| Center Number | Atomic Number | Atomic Type | Coordinates (Angstroms) |           |           |
|---------------|---------------|-------------|-------------------------|-----------|-----------|
|               |               |             | X                       | Y         | Z         |
| 1             | 6             | 0           | -0.292295               | 3.097899  | 1.337802  |
| 2             | 6             | 0           | -0.213912               | 3.428633  | 0.049343  |
| 3             | 6             | 0           | -1.083161               | 2.859947  | -1.053147 |
| 4             | 6             | 0           | -0.324337               | 1.852974  | -1.966493 |
| 5             | 6             | 0           | 1.049077                | 1.565686  | -1.933131 |
| 6             | 6             | 0           | 2.235959                | 2.396661  | -1.499851 |
| 7             | 6             | 0           | 3.410694                | 1.458454  | -1.514779 |
| 8             | 6             | 0           | 2.994675                | 0.202734  | -2.044066 |
| 9             | 6             | 0           | 1.723697                | -2.855520 | -0.864036 |
| 10            | 6             | 0           | 0.878814                | -3.680438 | 0.107657  |
| 11            | 6             | 0           | 0.449630                | -3.344913 | 1.384861  |
| 12            | 6             | 0           | 0.679010                | -2.069335 | 2.177284  |
| 13            | 6             | 0           | -0.721093               | -1.638066 | 2.580303  |
| 14            | 6             | 0           | -1.357505               | -0.387539 | 2.540627  |
| 15            | 6             | 0           | -0.604742               | 0.902104  | 2.522793  |
| 16            | 6             | 0           | -1.318426               | 2.160200  | 1.917682  |
| 17            | 7             | 0           | -2.223482               | 2.193890  | 4.207306  |
| 18            | 8             | 0           | 2.308504                | 3.595569  | -1.312737 |
| 19            | 8             | 0           | 0.528827                | 1.010384  | 2.950418  |
| 20            | 7             | 0           | -0.818533               | 4.410572  | -2.918545 |
| 21            | 6             | 0           | -2.316325               | 1.705637  | 0.876141  |
| 22            | 6             | 0           | -3.142695               | 1.420037  | -1.399709 |
| 23            | 7             | 0           | 4.638203                | 1.735523  | -1.155925 |
| 24            | 6             | 0           | -3.254230               | 0.698862  | 1.322296  |
| 25            | 6             | 0           | -1.140569               | 1.007947  | -2.782575 |
| 26            | 6             | 0           | -3.327176               | 0.000923  | -3.395283 |
| 27            | 6             | 0           | -1.134891               | 5.488222  | -3.659931 |
| 28            | 6             | 0           | -2.652042               | -1.051570 | -4.137363 |

|    |   |   |           |           |           |
|----|---|---|-----------|-----------|-----------|
| 29 | 6 | 0 | -1.591727 | 4.054945  | -1.892612 |
| 30 | 6 | 0 | -2.605093 | 0.970258  | -2.672843 |
| 31 | 6 | 0 | -4.293546 | 0.801139  | -0.897944 |
| 32 | 6 | 0 | -2.242375 | 2.049253  | -0.458532 |
| 33 | 6 | 0 | -1.274200 | -1.115782 | -4.084295 |
| 34 | 6 | 0 | -5.024195 | -0.189655 | -1.645471 |
| 35 | 6 | 0 | 0.728393  | -0.618204 | -3.000622 |
| 36 | 6 | 0 | -4.553105 | -0.578574 | -2.893097 |
| 37 | 6 | 0 | -4.347217 | 0.427142  | 0.498661  |
| 38 | 6 | 0 | -2.787771 | -0.340082 | 2.244247  |
| 39 | 6 | 0 | -0.533941 | -0.098115 | -3.412245 |
| 40 | 6 | 0 | -2.547939 | 4.178437  | 2.898004  |
| 41 | 6 | 0 | -2.065757 | 2.879518  | 3.068986  |
| 42 | 6 | 0 | -1.307351 | -3.534353 | -3.858578 |
| 43 | 6 | 0 | -3.552163 | -1.519198 | 2.328187  |
| 44 | 6 | 0 | -5.116435 | -0.789138 | 0.599865  |
| 45 | 6 | 0 | -3.217078 | 4.771433  | 3.966667  |
| 46 | 6 | 0 | 1.562514  | 0.284408  | -2.363127 |
| 47 | 6 | 0 | -4.609652 | -1.981091 | -3.280709 |
| 48 | 6 | 0 | -2.279472 | 6.243934  | -3.377938 |
| 49 | 6 | 0 | -0.922850 | -4.524676 | -2.891896 |
| 50 | 6 | 0 | -5.108882 | -2.936355 | -2.390333 |
| 51 | 6 | 0 | 0.634098  | -2.104026 | -3.140491 |
| 52 | 6 | 0 | -3.376530 | 4.059692  | 5.151340  |
| 53 | 6 | 0 | -0.150673 | 5.811251  | -4.792763 |
| 54 | 6 | 0 | -2.744918 | 4.764448  | -1.537453 |
| 55 | 6 | 0 | 0.980190  | -3.057876 | -2.188925 |
| 56 | 6 | 0 | -2.862334 | 2.756792  | 5.244364  |
| 57 | 6 | 0 | -5.550827 | -1.177007 | -0.724643 |
| 58 | 6 | 0 | -2.131417 | -5.122980 | -2.351405 |
| 59 | 6 | 0 | -1.038818 | -5.247741 | -0.155029 |
| 60 | 6 | 0 | -0.563770 | -2.358332 | -3.936646 |
| 61 | 6 | 0 | -2.904814 | -2.790969 | 2.497671  |
| 62 | 6 | 0 | -3.424659 | -2.269644 | -4.060080 |
| 63 | 6 | 0 | -4.423173 | -4.207551 | -2.235094 |
| 64 | 6 | 0 | 0.167925  | -4.249355 | -2.060294 |
| 65 | 6 | 0 | -3.088485 | 5.872792  | -2.303750 |
| 66 | 6 | 0 | -1.518138 | -2.828651 | 2.528858  |
| 67 | 6 | 0 | 0.105590  | -4.621332 | -0.661903 |
| 68 | 6 | 0 | -3.270442 | -4.479260 | -2.981058 |
| 69 | 6 | 0 | -2.759101 | -3.491485 | -3.913968 |
| 70 | 6 | 0 | -0.806871 | -3.882095 | 1.838671  |
| 71 | 6 | 0 | -5.590904 | -2.525011 | -1.083061 |
| 72 | 6 | 0 | -5.202019 | -3.539162 | -0.118882 |
| 73 | 6 | 0 | -4.730869 | -1.750911 | 1.520108  |
| 74 | 6 | 0 | -3.386405 | -5.208204 | -0.229172 |
| 75 | 6 | 0 | -4.786703 | -3.157451 | 1.162873  |
| 76 | 6 | 0 | -0.024544 | 4.571642  | -5.707068 |
| 77 | 6 | 0 | -3.652939 | -3.807077 | 1.780496  |
| 78 | 6 | 0 | -1.516126 | -4.853421 | 1.140904  |
| 79 | 6 | 0 | -2.188275 | -5.481175 | -1.006762 |
| 80 | 6 | 0 | -2.967350 | -4.815319 | 1.101119  |
| 81 | 6 | 0 | -4.483196 | -4.579947 | -0.830392 |

|     |   |   |           |           |           |     |   |   |           |           |           |
|-----|---|---|-----------|-----------|-----------|-----|---|---|-----------|-----------|-----------|
| 82  | 6 | 0 | 1.225715  | 6.125033  | -4.159737 | 121 | 1 | 0 | -3.353658 | 4.451559  | -0.695601 |
| 83  | 6 | 0 | -0.603904 | 7.013964  | -5.638271 | 122 | 1 | 0 | -3.980861 | 6.447137  | -2.067958 |
| 84  | 6 | 0 | -2.996707 | 1.936836  | 6.536528  | 123 | 1 | 0 | 0.715197  | 4.756349  | -6.495237 |
| 85  | 6 | 0 | -4.489766 | 1.818210  | 6.922379  | 124 | 1 | 0 | -0.981556 | 4.337872  | -6.189564 |
| 86  | 6 | 0 | -2.229275 | 2.657963  | 7.670498  | 125 | 1 | 0 | 0.288775  | 3.697438  | -5.130887 |
| 87  | 6 | 0 | -2.414476 | 0.523529  | 6.360965  | 126 | 1 | 0 | 1.974277  | 6.289824  | -4.944240 |
| 88  | 6 | 0 | 5.521348  | 0.703520  | -1.327006 | 127 | 1 | 0 | 1.560147  | 5.302929  | -3.521191 |
| 89  | 7 | 0 | 3.816131  | -0.804869 | -2.246706 | 128 | 1 | 0 | 1.177264  | 7.031922  | -3.544798 |
| 90  | 6 | 0 | 5.114553  | -0.555235 | -1.885004 | 129 | 1 | 0 | 0.126368  | 7.199908  | -6.433589 |
| 91  | 6 | 0 | 6.092648  | -1.557947 | -2.072707 | 130 | 1 | 0 | -0.677471 | 7.930633  | -5.041283 |
| 92  | 6 | 0 | 6.874185  | 0.887051  | -0.959462 | 131 | 1 | 0 | -1.574454 | 6.835939  | -6.116905 |
| 93  | 6 | 0 | 7.816415  | -0.104865 | -1.148052 | 132 | 1 | 0 | -5.063102 | 1.321187  | 6.131536  |
| 94  | 6 | 0 | 7.415843  | -1.355600 | -1.727870 | 133 | 1 | 0 | -4.948212 | 2.795846  | 7.107468  |
| 95  | 6 | 0 | 8.434090  | -2.444210 | -1.962993 | 134 | 1 | 0 | -4.594190 | 1.225217  | 7.838672  |
| 96  | 6 | 0 | 9.254119  | 0.127408  | -0.751894 | 135 | 1 | 0 | -2.313003 | 2.088234  | 8.603727  |
| 97  | 6 | 0 | 4.067048  | -0.896297 | 2.350431  | 136 | 1 | 0 | -2.623320 | 3.663294  | 7.857405  |
| 98  | 6 | 0 | 5.413486  | -1.265747 | 2.237836  | 137 | 1 | 0 | -1.165429 | 2.752508  | 7.425746  |
| 99  | 6 | 0 | 5.794063  | -2.606174 | 2.151377  | 138 | 1 | 0 | -2.511197 | -0.029883 | 7.302533  |
| 100 | 6 | 0 | 4.809799  | -3.619594 | 2.176931  | 139 | 1 | 0 | -1.357553 | 0.556274  | 6.083082  |
| 101 | 6 | 0 | 3.471063  | -3.246786 | 2.254059  | 140 | 1 | 0 | -2.942049 | -0.032015 | 5.579722  |
| 102 | 6 | 0 | 3.064580  | -1.901933 | 2.318331  | 141 | 1 | 0 | 5.768678  | -2.498634 | -2.509319 |
| 103 | 7 | 0 | 3.639020  | 0.434983  | 2.509042  | 142 | 1 | 0 | 7.142525  | 1.840853  | -0.515848 |
| 104 | 7 | 0 | 1.755341  | -1.461675 | 2.506872  | 143 | 1 | 0 | 8.923556  | -2.749535 | -1.029360 |
| 105 | 6 | 0 | 5.191066  | -5.080558 | 2.135211  | 144 | 1 | 0 | 9.230849  | -2.109909 | -2.639741 |
| 106 | 6 | 0 | 7.259229  | -2.957425 | 2.061830  | 145 | 1 | 0 | 7.968832  | -3.329764 | -2.405037 |
| 107 | 6 | 0 | 4.424141  | 1.549301  | 2.510024  | 146 | 1 | 0 | 9.594316  | -0.608022 | -0.011395 |
| 108 | 8 | 0 | 5.631036  | 1.605272  | 2.342219  | 147 | 1 | 0 | 9.383715  | 1.122548  | -0.318328 |
| 109 | 6 | 0 | 3.625518  | 2.863100  | 2.710885  | 148 | 1 | 0 | 9.930112  | 0.043302  | -1.612671 |
| 110 | 9 | 0 | 4.452425  | 3.865833  | 3.011445  | 149 | 1 | 0 | 6.165621  | -0.490000 | 2.239146  |
| 111 | 9 | 0 | 2.718288  | 2.750281  | 3.705342  | 150 | 1 | 0 | 2.713969  | -4.021214 | 2.302375  |
| 112 | 9 | 0 | 2.957528  | 3.185081  | 1.582899  | 151 | 1 | 0 | 2.639462  | 0.532544  | 2.704127  |
| 113 | 1 | 0 | 0.405931  | 3.530308  | 2.046033  | 152 | 1 | 0 | 5.842327  | -5.354902 | 2.975208  |
| 114 | 1 | 0 | 0.537864  | 4.134388  | -0.276957 | 153 | 1 | 0 | 4.305161  | -5.721237 | 2.179111  |
| 115 | 1 | 0 | 2.763680  | -3.202582 | -0.922413 | 154 | 1 | 0 | 5.739128  | -5.332844 | 1.217850  |
| 116 | 1 | 0 | 1.768672  | -1.804746 | -0.570553 | 155 | 1 | 0 | 7.879275  | -2.056690 | 2.048254  |
| 117 | 1 | 0 | -2.391357 | 4.708155  | 1.964276  | 156 | 1 | 0 | 7.580178  | -3.572756 | 2.912725  |
| 118 | 1 | 0 | -3.606464 | 5.782271  | 3.876708  | 157 | 1 | 0 | 7.480722  | -3.536081 | 1.155499  |
| 119 | 1 | 0 | -2.540460 | 7.107097  | -3.978615 |     |   |   |           |           |           |
| 120 | 1 | 0 | -3.889744 | 4.511963  | 5.993659  |     |   |   |           |           |           |

The total electronic energy was calculated to be -4691.3524818 Hartree.

Table S7. Optimized structure of **5** (B3LYP/6-31G(d))

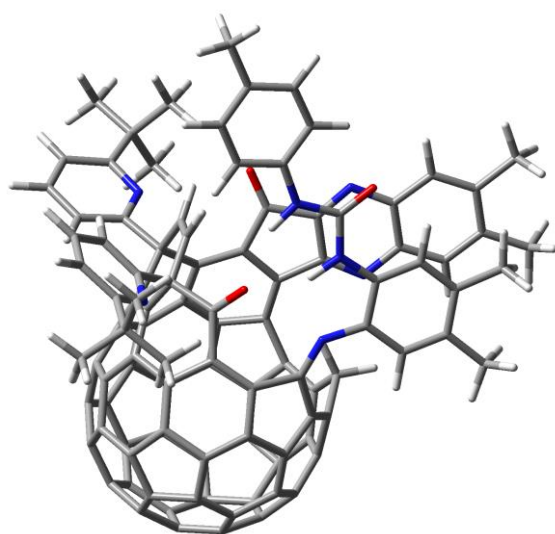

Standard orientation:

| Center Number | Atomic Number | Atomic Type | Coordinates (Angstroms) |           |           |
|---------------|---------------|-------------|-------------------------|-----------|-----------|
|               |               |             | X                       | Y         | Z         |
| 1             | 6             | 0           | -1.361951               | 2.544752  | 0.774693  |
| 2             | 6             | 0           | -1.182449               | 2.030041  | 1.990865  |
| 3             | 6             | 0           | 0.148521                | 1.607273  | 2.576214  |
| 4             | 6             | 0           | 0.298530                | 0.061182  | 2.685013  |
| 5             | 6             | 0           | -0.701419               | -0.897660 | 2.449507  |
| 6             | 6             | 0           | -2.207475               | -0.832055 | 2.577069  |
| 7             | 6             | 0           | -2.715204               | -2.144908 | 2.046582  |
| 8             | 6             | 0           | -1.605107               | -2.967499 | 1.699732  |
| 9             | 6             | 0           | 0.508392                | -3.565407 | -1.057802 |
| 10            | 6             | 0           | 1.277296                | -3.115473 | -2.301832 |
| 11            | 6             | 0           | 1.059370                | -1.995721 | -3.096935 |
| 12            | 6             | 0           | 0.024434                | -0.895991 | -2.959291 |
| 13            | 6             | 0           | 0.839469                | 0.383008  | -3.001011 |
| 14            | 6             | 0           | 0.782678                | 1.552130  | -2.218715 |
| 15            | 6             | 0           | -0.434700               | 2.032240  | -1.511894 |
| 16            | 6             | 0           | -0.252010               | 2.862440  | -0.195633 |
| 17            | 7             | 0           | -0.164963               | 4.661248  | -1.874307 |
| 18            | 8             | 0           | -2.902118               | 0.015659  | 3.104175  |
| 19            | 8             | 0           | -1.566090               | 1.832334  | -1.930030 |
| 20            | 7             | 0           | -0.254421               | 1.522037  | 4.981858  |
| 21            | 6             | 0           | 1.107716                | 2.575431  | 0.402668  |



|    |   |   |           |           |           |     |   |   |           |           |           |
|----|---|---|-----------|-----------|-----------|-----|---|---|-----------|-----------|-----------|
| 22 | 6 | 0 | 2.636766  | 1.686441  | 2.081003  | 94  | 6 | 0 | -4.567614 | -6.428190 | 0.550450  |
| 23 | 7 | 0 | -3.965610 | -2.519598 | 1.954168  | 95  | 6 | 0 | -4.799897 | -7.841974 | 0.075936  |
| 24 | 6 | 0 | 2.217370  | 2.693696  | -0.517063 | 96  | 6 | 0 | -7.093091 | -6.109444 | 0.771897  |
| 25 | 6 | 0 | 1.630528  | -0.427079 | 2.866862  | 97  | 6 | 0 | -3.508410 | -1.554878 | -2.594621 |
| 26 | 6 | 0 | 4.097341  | -0.136583 | 2.839806  | 98  | 6 | 0 | -4.534912 | -2.510165 | -2.662952 |
| 27 | 6 | 0 | -0.283564 | 2.023582  | 6.230264  | 99  | 6 | 0 | -4.278091 | -3.813369 | -3.082184 |
| 28 | 6 | 0 | 4.283668  | -1.577409 | 2.782111  | 100 | 6 | 0 | -2.963624 | -4.201445 | -3.450633 |
| 29 | 6 | 0 | 0.246608  | 2.247340  | 3.981878  | 101 | 6 | 0 | -1.943099 | -3.264578 | -3.357850 |
| 30 | 6 | 0 | 2.813492  | 0.441908  | 2.810165  | 102 | 6 | 0 | -2.170330 | -1.944178 | -2.918973 |
| 31 | 6 | 0 | 3.719023  | 2.203732  | 1.358935  | 103 | 7 | 0 | -3.686025 | -0.230464 | -2.235793 |
| 32 | 6 | 0 | 1.300724  | 2.057247  | 1.667249  | 104 | 7 | 0 | -1.251951 | -0.911573 | -2.849899 |
| 33 | 6 | 0 | 3.169377  | -2.381293 | 2.654423  | 105 | 6 | 0 | -2.672832 | -5.600801 | -3.939655 |
| 34 | 6 | 0 | 5.026816  | 1.601078  | 1.392798  | 106 | 6 | 0 | -5.414982 | -4.802615 | -3.159641 |
| 35 | 6 | 0 | 0.946885  | -2.659884 | 2.015898  | 107 | 6 | 0 | -4.866147 | 0.437490  | -1.926324 |
| 36 | 6 | 0 | 5.219766  | 0.445599  | 2.138487  | 108 | 8 | 0 | -5.971874 | -0.090966 | -1.894123 |
| 37 | 6 | 0 | 3.503473  | 2.713009  | 0.022197  | 109 | 7 | 0 | -4.616678 | 1.771799  | -1.660312 |
| 38 | 6 | 0 | 2.035660  | 2.232874  | -1.894943 | 110 | 6 | 0 | -5.539162 | 2.780734  | -1.331935 |
| 39 | 6 | 0 | 1.863845  | -1.807262 | 2.696108  | 111 | 6 | 0 | -6.915952 | 2.564874  | -1.160507 |
| 40 | 6 | 0 | -0.539139 | 5.338455  | 0.397610  | 112 | 6 | 0 | -7.744010 | 3.636804  | -0.833462 |
| 41 | 6 | 0 | -0.329057 | 4.364137  | -0.579667 | 113 | 6 | 0 | -7.255025 | 4.937925  | -0.661548 |
| 42 | 6 | 0 | 4.273781  | -3.805144 | 1.025029  | 114 | 6 | 0 | -8.170871 | 6.076140  | -0.275365 |
| 43 | 6 | 0 | 3.195317  | 1.943764  | -2.637779 | 115 | 6 | 0 | -5.880833 | 5.135472  | -0.840149 |
| 44 | 6 | 0 | 4.681338  | 2.418495  | -0.757451 | 116 | 6 | 0 | -5.034229 | 4.081356  | -1.170256 |
| 45 | 6 | 0 | -0.576749 | 6.671058  | -0.009426 | 117 | 1 | 0 | -2.365747 | 2.807816  | 0.454814  |
| 46 | 6 | 0 | -0.371111 | -2.237280 | 2.019302  | 118 | 1 | 0 | -2.036736 | 1.872024  | 2.635260  |
| 47 | 6 | 0 | 6.057680  | -0.622461 | 1.612182  | 119 | 1 | 0 | -0.166589 | -4.408359 | -1.255650 |
| 48 | 6 | 0 | 0.216223  | 3.303074  | 6.502672  | 120 | 1 | 0 | -0.116418 | -2.765423 | -0.655554 |
| 49 | 6 | 0 | 4.118183  | -4.168603 | -0.356347 | 121 | 1 | 0 | -0.678481 | 5.059839  | 1.436610  |
| 50 | 6 | 0 | 6.638374  | -0.499747 | 0.346388  | 122 | 1 | 0 | -0.739093 | 7.461672  | 0.718571  |
| 51 | 6 | 0 | 1.774970  | -3.635075 | 1.244805  | 123 | 1 | 0 | 0.200105  | 3.705464  | 7.508476  |
| 52 | 6 | 0 | -0.410582 | 6.978799  | -1.355771 | 124 | 1 | 0 | -0.443697 | 8.011884  | -1.686192 |
| 53 | 6 | 0 | -0.906574 | 1.103822  | 7.289723  | 125 | 1 | 0 | 1.154508  | 4.106123  | 3.335128  |
| 54 | 6 | 0 | 0.754222  | 3.538490  | 4.168521  | 126 | 1 | 0 | 1.130534  | 5.059155  | 5.647243  |
| 55 | 6 | 0 | 1.638857  | -3.954811 | -0.101765 | 127 | 1 | 0 | -0.604688 | -0.936849 | 7.998974  |
| 56 | 6 | 0 | -0.204964 | 5.940038  | -2.278086 | 128 | 1 | 0 | 0.904208  | -0.099243 | 7.587099  |
| 57 | 6 | 0 | 5.638615  | 1.736038  | 0.085825  | 129 | 1 | 0 | -0.156773 | -0.691582 | 6.295151  |
| 58 | 6 | 0 | 5.220288  | -3.588514 | -1.104220 | 130 | 1 | 0 | -2.840457 | 0.140346  | 7.600489  |
| 59 | 6 | 0 | 3.677036  | -3.167905 | -2.969691 | 131 | 1 | 0 | -2.462213 | 0.453908  | 5.889549  |
| 60 | 6 | 0 | 3.131919  | -3.516337 | 1.770116  | 132 | 1 | 0 | -2.962921 | 1.784261  | 6.946750  |
| 61 | 6 | 0 | 3.207382  | 0.834353  | -3.550923 | 133 | 1 | 0 | -1.297681 | 1.017835  | 9.419956  |
| 62 | 6 | 0 | 5.472088  | -1.881534 | 2.019450  | 134 | 1 | 0 | -1.410885 | 2.653412  | 8.764352  |
| 63 | 6 | 0 | 6.629171  | -1.631143 | -0.564953 | 135 | 1 | 0 | 0.180002  | 1.904058  | 9.025340  |
| 64 | 6 | 0 | 2.826523  | -4.190080 | -0.893914 | 136 | 1 | 0 | 2.112433  | 6.675759  | -3.612107 |
| 65 | 6 | 0 | 0.738604  | 4.063288  | 5.456424  | 137 | 1 | 0 | 1.080377  | 8.108738  | -3.463024 |
| 66 | 6 | 0 | 2.074730  | 0.036886  | -3.638841 | 138 | 1 | 0 | 1.331518  | 7.363892  | -5.047619 |
| 67 | 6 | 0 | 2.603200  | -3.676366 | -2.230168 | 139 | 1 | 0 | -1.187453 | 7.141427  | -5.381993 |
| 68 | 6 | 0 | 6.050090  | -2.843768 | -0.173622 | 140 | 1 | 0 | -1.487232 | 7.881749  | -3.803269 |
| 69 | 6 | 0 | 5.460168  | -2.974830 | 1.146180  | 141 | 1 | 0 | -2.183038 | 6.296802  | -4.182701 |
| 70 | 6 | 0 | 2.203182  | -1.398794 | -3.740438 | 142 | 1 | 0 | 0.299717  | 5.161212  | -5.633714 |
| 71 | 6 | 0 | 6.424274  | 0.706518  | -0.434029 | 143 | 1 | 0 | -0.648981 | 4.236028  | -4.449419 |
| 72 | 6 | 0 | 6.279666  | 0.322819  | -1.827180 | 144 | 1 | 0 | 1.093634  | 4.402819  | -4.237503 |
| 73 | 6 | 0 | 4.529026  | 2.048327  | -2.084495 | 145 | 1 | 0 | -2.423967 | -6.556967 | 0.414575  |
| 74 | 6 | 0 | 5.610581  | -1.844140 | -2.804409 | 146 | 1 | 0 | -6.269727 | -3.646139 | 1.608111  |
| 75 | 6 | 0 | 5.352079  | 0.987437  | -2.638504 | 147 | 1 | 0 | -5.422605 | -7.869411 | -0.827450 |
| 76 | 6 | 0 | -0.142397 | -0.239672 | 7.290054  | 148 | 1 | 0 | -5.321733 | -8.439811 | 0.834180  |
| 77 | 6 | 0 | 4.529323  | 0.237165  | -3.560690 | 149 | 1 | 0 | -3.854130 | -8.341717 | -0.151667 |
| 78 | 6 | 0 | 3.467081  | -1.979254 | -3.747107 | 150 | 1 | 0 | -7.328496 | -6.404134 | -0.258874 |
| 79 | 6 | 0 | 5.004122  | -3.099088 | -2.390069 | 151 | 1 | 0 | -7.817553 | -5.349132 | 1.075885  |
| 80 | 6 | 0 | 4.654994  | -1.150203 | -3.643624 | 152 | 1 | 0 | -7.252973 | -6.996571 | 1.398092  |
| 81 | 6 | 0 | 6.407120  | -1.121031 | -1.908791 | 153 | 1 | 0 | -5.539253 | -2.203728 | -2.403722 |
| 82 | 6 | 0 | -2.383726 | 0.853912  | 6.903934  | 154 | 1 | 0 | -0.942284 | -3.547353 | -3.664329 |
| 83 | 6 | 0 | -0.850242 | 1.713311  | 8.701296  | 155 | 1 | 0 | -2.820071 | 0.304938  | -2.300557 |
| 84 | 6 | 0 | -0.028022 | 6.226226  | -3.776596 | 156 | 1 | 0 | -3.265828 | -5.857171 | -4.827332 |
| 85 | 6 | 0 | 1.195799  | 7.150046  | -3.980853 | 157 | 1 | 0 | -1.616838 | -5.713015 | -4.204711 |
| 86 | 6 | 0 | -1.297942 | 6.929878  | -4.311879 | 158 | 1 | 0 | -2.906128 | -6.356088 | -3.177158 |
| 87 | 6 | 0 | 0.191509  | 4.925556  | -4.568536 | 159 | 1 | 0 | -6.358580 | -4.342640 | -2.853946 |
| 88 | 6 | 0 | -4.137671 | -3.790463 | 1.475030  | 160 | 1 | 0 | -5.542983 | -5.191590 | -4.178355 |
| 89 | 7 | 0 | -1.727404 | -4.195858 | 1.245015  | 161 | 1 | 0 | -5.234025 | -5.670090 | -2.511395 |
| 90 | 6 | 0 | -3.023497 | -4.625222 | 1.124632  | 162 | 1 | 0 | -3.645802 | 2.066414  | -1.699053 |
| 91 | 6 | 0 | -3.280421 | -5.936797 | 0.664381  | 163 | 1 | 0 | -7.317293 | 1.569408  | -1.286979 |
| 92 | 6 | 0 | -5.448171 | -4.304002 | 1.340078  | 164 | 1 | 0 | -8.808582 | 3.448662  | -0.707729 |
| 93 | 6 | 0 | -5.681432 | -5.589849 | 0.893516  | 165 | 1 | 0 | -7.734489 | 7.046860  | -0.535123 |

|     |   |   |           |          |           |                                                                         |   |   |           |          |           |
|-----|---|---|-----------|----------|-----------|-------------------------------------------------------------------------|---|---|-----------|----------|-----------|
| 166 | 1 | 0 | -8.369340 | 6.087411 | 0.805263  | 169                                                                     | 1 | 0 | -3.971590 | 4.266742 | -1.315682 |
| 167 | 1 | 0 | -9.141574 | 6.000020 | -0.778747 | -----                                                                   |   |   |           |          |           |
| 168 | 1 | 0 | -5.461526 | 6.132661 | -0.723363 | The total electronic energy was calculated to be -4680.0658406 Hartree. |   |   |           |          |           |

**Table S8.** Optimized structure of **2** (B3LYP/6-31G(d))

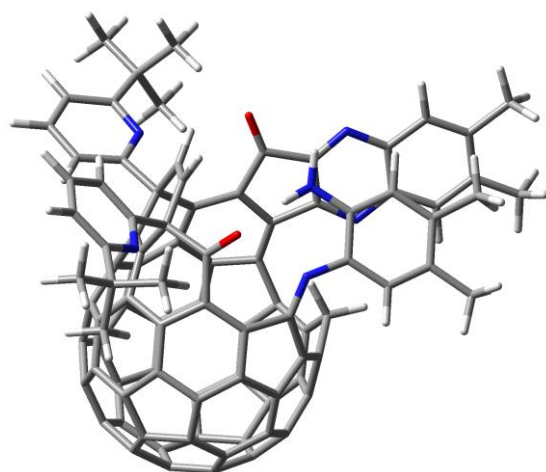

Standard orientation:

| Center Number | Atomic Number | Atomic Type | Coordinates (Angstroms) |           |           |
|---------------|---------------|-------------|-------------------------|-----------|-----------|
|               |               |             | X                       | Y         | Z         |
| 1             | 6             | 0           | -0.685981               | 2.971190  | 1.908816  |
| 2             | 6             | 0           | -0.166826               | 3.386538  | 0.756190  |
| 3             | 6             | 0           | -0.621677               | 2.932388  | -0.613471 |
| 4             | 6             | 0           | 0.420420                | 2.029477  | -1.327262 |
| 5             | 6             | 0           | 1.731670                | 1.756891  | -0.901065 |
| 6             | 6             | 0           | 2.720420                | 2.539799  | -0.060372 |
| 7             | 6             | 0           | 3.944236                | 1.665269  | 0.042931  |
| 8             | 6             | 0           | 3.707227                | 0.449663  | -0.659770 |
| 9             | 6             | 0           | 2.192400                | -2.607263 | -0.157242 |
| 10            | 6             | 0           | 1.134096                | -3.535097 | 0.435726  |
| 11            | 6             | 0           | 0.302851                | -3.299261 | 1.525503  |
| 12            | 6             | 0           | 0.188809                | -2.037398 | 2.353027  |
| 13            | 6             | 0           | -1.295460               | -1.773278 | 2.448052  |
| 14            | 6             | 0           | -1.984969               | -0.555897 | 2.375706  |
| 15            | 6             | 0           | -1.400417               | 0.746478  | 2.800133  |
| 16            | 6             | 0           | -1.849132               | 2.027002  | 2.022279  |
| 17            | 7             | 0           | -3.660893               | 1.880551  | 3.653614  |
| 18            | 8             | 0           | 2.662313                | 3.682983  | 0.352596  |
| 19            | 8             | 0           | -0.626661               | 0.853531  | 3.732431  |
| 20            | 7             | 0           | 0.261591                | 4.656931  | -2.063464 |
| 21            | 6             | 0           | -2.409902               | 1.640106  | 0.676056  |
| 22            | 6             | 0           | -2.423515               | 1.556653  | -1.757956 |
| 23            | 7             | 0           | 5.077806                | 1.965692  | 0.622033  |
| 24            | 6             | 0           | -3.415575               | 0.599863  | 0.703112  |
| 25            | 6             | 0           | -0.067708               | 1.293975  | -2.455747 |
| 26            | 6             | 0           | -1.908546               | 0.353453  | -3.836099 |
| 27            | 6             | 0           | 0.221927                | 5.802998  | -2.762978 |
| 28            | 6             | 0           | -0.995167               | -0.608092 | -4.434100 |
| 29            | 6             | 0           | -0.831542               | 4.210515  | -1.448148 |
| 30            | 6             | 0           | -1.489654               | 1.240852  | -2.824065 |
| 31            | 6             | 0           | -3.656227               | 0.891454  | -1.719717 |
| 32            | 6             | 0           | -1.898418               | 2.089596  | -0.521171 |
| 33            | 6             | 0           | 0.302764                | -0.661587 | -3.970843 |
| 34            | 6             | 0           | -4.067233               | -0.026296 | -2.751062 |
| 35            | 6             | 0           | 1.847162                | -0.268503 | -2.278155 |
| 36            | 6             | 0           | -3.206730               | -0.283786 | -3.809827 |
| 37            | 6             | 0           | -4.156533               | 0.389312  | -0.458082 |
| 38            | 6             | 0           | -3.236660               | -0.514963 | 1.635863  |
| 39            | 6             | 0           | 0.750165                | 0.282046  | -2.996595 |
| 40            | 6             | 0           | -3.314141               | 4.032632  | 2.655374  |
| 41            | 6             | 0           | -2.987289               | 2.684381  | 2.833217  |
| 42            | 6             | 0           | 0.303278                | -3.092994 | -3.987461 |
| 43            | 6             | 0           | -3.912872               | -1.717291 | 1.355118  |
| 44            | 6             | 0           | -4.861526               | -0.844371 | -0.721299 |
| 45            | 6             | 0           | -4.387519               | 4.536439  | 3.382900  |
| 46            | 6             | 0           | 2.403441                | 0.548639  | -1.313929 |
| 47            | 6             | 0           | -3.081131               | -1.640152 | -4.326207 |
| 48            | 6             | 0           | -0.964346               | 6.540411  | -2.865520 |
| 49            | 6             | 0           | 0.410153                | -4.162857 | -3.031297 |
| 50            | 6             | 0           | -3.792966               | -2.685114 | -3.730354 |
| 51            | 6             | 0           | 1.877144                | -1.721440 | -2.593893 |
| 52            | 6             | 0           | -5.090351               | 3.695604  | 4.248295  |
| 53            | 6             | 0           | 1.557150                | 6.209934  | -3.394725 |
| 54            | 6             | 0           | -2.052345               | 4.891907  | -1.484394 |
| 55            | 6             | 0           | 1.941997                | -2.744769 | -1.657371 |
| 56            | 6             | 0           | -4.699647               | 2.356133  | 4.362712  |
| 57            | 6             | 0           | -4.822005               | -1.106073 | -2.143944 |
| 58            | 6             | 0           | -0.881832               | -4.822150 | -2.945630 |
| 59            | 6             | 0           | -0.525726               | -5.120257 | -0.531367 |
| 60            | 6             | 0           | 0.990879                | -1.906475 | -3.738230 |
| 61            | 6             | 0           | -3.271074               | -2.980157 | 1.601899  |
| 62            | 6             | 0           | -1.701625               | -1.836428 | -4.717842 |
| 63            | 6             | 0           | -3.133903               | -3.955502 | -3.478174 |
| 64            | 6             | 0           | 1.176465                | -3.950491 | -1.878869 |
| 65            | 6             | 0           | -2.109040               | 6.074652  | -2.215695 |
| 66            | 6             | 0           | -1.955882               | -2.976830 | 2.053153  |
| 67            | 6             | 0           | 0.692851                | -4.433454 | -0.600453 |
| 68            | 6             | 0           | -1.795901               | -4.138120 | -3.843795 |
| 69            | 6             | 0           | -1.062731               | -3.059800 | -4.482621 |
| 70            | 6             | 0           | -0.997588               | -3.924432 | 1.529954  |
| 71            | 6             | 0           | -4.683282               | -2.412502 | -2.614947 |
| 72            | 6             | 0           | -4.573662               | -3.511181 | -1.671186 |
| 73            | 6             | 0           | -4.748433               | -1.888294 | 0.184828  |
| 74            | 6             | 0           | -2.731778               | -5.122163 | -1.339973 |
| 75            | 6             | 0           | -4.609371               | -3.252515 | -0.295663 |
| 76            | 6             | 0           | 2.054358                | 5.046760  | -4.282314 |
| 77            | 6             | 0           | -3.693208               | -3.934179 | 0.593108  |
| 78            | 6             | 0           | -1.401658               | -4.851818 | 0.573826  |
| 79            | 6             | 0           | -1.338714               | -5.297828 | -1.719005 |
| 80            | 6             | 0           | -2.770296               | -4.847687 | 0.082272  |
| 81            | 6             | 0           | -3.614686               | -4.462514 | -2.202750 |
| 82            | 6             | 0           | 2.571550                | 6.449854  | -2.251906 |
| 83            | 6             | 0           | 1.438432                | 7.482783  | -4.248274 |
| 84            | 6             | 0           | -5.391785               | 1.325662  | 5.261150  |
| 85            | 6             | 0           | -6.529956               | 1.942550  | 6.090426  |
| 86            | 6             | 0           | -4.337479               | 0.718959  | 6.214571  |
| 87            | 6             | 0           | -5.967371               | 0.208539  | 4.360407  |
| 88            | 6             | 0           | 6.035562                | 0.988219  | 0.521490  |
| 89            | 7             | 0           | 4.585289                | -0.523762 | -0.753839 |
| 90            | 6             | 0           | 5.780060                | -0.259962 | -0.138517 |
| 91            | 6             | 0           | 6.801579                | -1.235242 | -0.165550 |
| 92            | 6             | 0           | 7.307104                | 1.206961  | 1.097508  |
| 93            | 6             | 0           | 8.298315                | 0.246020  | 1.053784  |
| 94            | 6             | 0           | 8.036395                | -1.008382 | 0.410848  |
| 95            | 6             | 0           | 9.101196                | -2.076440 | 0.379159  |

|     |   |   |           |           |           |     |   |   |           |           |           |
|-----|---|---|-----------|-----------|-----------|-----|---|---|-----------|-----------|-----------|
| 96  | 6 | 0 | 9.638057  | 0.498407  | 1.698441  | 126 | 1 | 0 | -7.323698 | 2.351778  | 5.454132  |
| 97  | 6 | 0 | 3.168914  | -0.133865 | 2.923321  | 127 | 1 | 0 | -6.166919 | 2.742440  | 6.746656  |
| 98  | 6 | 0 | 4.549689  | -0.193040 | 3.167115  | 128 | 1 | 0 | -6.981807 | 1.172904  | 6.725782  |
| 99  | 6 | 0 | 5.220167  | -1.403668 | 3.327657  | 129 | 1 | 0 | -4.793939 | -0.065842 | 6.829359  |
| 100 | 6 | 0 | 4.505327  | -2.622215 | 3.220076  | 130 | 1 | 0 | -3.928981 | 1.483780  | 6.885817  |
| 101 | 6 | 0 | 3.135020  | -2.571618 | 2.991967  | 131 | 1 | 0 | -3.507989 | 0.286328  | 5.649060  |
| 102 | 6 | 0 | 2.440638  | -1.355208 | 2.852121  | 132 | 1 | 0 | -6.441955 | -0.565098 | 4.975829  |
| 103 | 7 | 0 | 2.512097  | 1.059855  | 2.688744  | 133 | 1 | 0 | -5.177357 | -0.257129 | 3.765217  |
| 104 | 7 | 0 | 1.066516  | -1.214795 | 2.788733  | 134 | 1 | 0 | -6.722507 | 0.607406  | 3.672324  |
| 105 | 6 | 0 | 5.210040  | -3.947780 | 3.380979  | 135 | 1 | 0 | 6.581200  | -2.175662 | -0.662922 |
| 106 | 6 | 0 | 6.692179  | -1.418404 | 3.656340  | 136 | 1 | 0 | 7.475708  | 2.162571  | 1.586335  |
| 107 | 1 | 0 | -0.288885 | 3.336711  | 2.851008  | 137 | 1 | 0 | 9.394929  | -2.376767 | 1.393550  |
| 108 | 1 | 0 | 0.656201  | 4.087298  | 0.750895  | 138 | 1 | 0 | 10.012387 | -1.723446 | -0.120012 |
| 109 | 1 | 0 | 3.215973  | -2.878424 | 0.130432  | 139 | 1 | 0 | 8.752221  | -2.968739 | -0.148068 |
| 110 | 1 | 0 | 2.051502  | -1.578848 | 0.180418  | 140 | 1 | 0 | 9.836523  | -0.225620 | 2.499586  |
| 111 | 1 | 0 | -2.743230 | 4.652403  | 1.971832  | 141 | 1 | 0 | 9.686362  | 1.501013  | 2.132549  |
| 112 | 1 | 0 | -4.678818 | 5.578519  | 3.279010  | 142 | 1 | 0 | 10.459178 | 0.403310  | 0.976852  |
| 113 | 1 | 0 | -1.003484 | 7.460324  | -3.436871 | 143 | 1 | 0 | 5.104121  | 0.738190  | 3.242346  |
| 114 | 1 | 0 | -5.925914 | 4.083504  | 4.818315  | 144 | 1 | 0 | 2.565055  | -3.495410 | 2.962209  |
| 115 | 1 | 0 | -2.921448 | 4.502004  | -0.964675 | 145 | 1 | 0 | 1.517963  | 1.041947  | 2.901379  |
| 116 | 1 | 0 | -3.038942 | 6.633751  | -2.281497 | 146 | 1 | 0 | 2.986109  | 1.900605  | 2.992573  |
| 117 | 1 | 0 | 3.034351  | 5.290354  | -4.709561 | 147 | 1 | 0 | 5.693185  | -4.039713 | 4.362832  |
| 118 | 1 | 0 | 1.358676  | 4.858767  | -5.109068 | 148 | 1 | 0 | 4.510475  | -4.782860 | 3.275731  |
| 119 | 1 | 0 | 2.144113  | 4.128219  | -3.696512 | 149 | 1 | 0 | 5.999989  | -4.078981 | 2.629137  |
| 120 | 1 | 0 | 3.558589  | 6.686151  | -2.667807 | 150 | 1 | 0 | 7.106243  | -0.407343 | 3.682199  |
| 121 | 1 | 0 | 2.659515  | 5.564994  | -1.615009 | 151 | 1 | 0 | 6.874424  | -1.888331 | 4.631931  |
| 122 | 1 | 0 | 2.258984  | 7.291588  | -1.621900 | 152 | 1 | 0 | 7.261483  | -1.991227 | 2.914865  |
| 123 | 1 | 0 | 2.413154  | 7.726615  | -4.685089 |     |   |   |           |           |           |
| 124 | 1 | 0 | 1.120584  | 8.345976  | -3.651632 |     |   |   |           |           |           |
| 125 | 1 | 0 | 0.728029  | 7.353317  | -5.073687 |     |   |   |           |           |           |

-----  
The total electronic energy was calculated to be -4241.2453416 Hartree.

## 7. References

- (1) Y. Hashikawa, S. Sadai and Murata, *Y. Org. Lett.*, 2021, **23**, 9586–9590.
- (2) G. M. Sheldrick, *Acta Crystallogr. A*, 2015, **71**, 3–8.
